# Supplementary material
Source: Research Square preprint supplement (doi:10.21203/rs.3.rs-9762282/v1)
Supplement: Supplementary file 1 [file ebba1941aa33f4330dfb30cc.xlsx]

## Sheet: All 269 patients ser&grad
Resec/Biopsy	KPS	Age	OS (mon)	Status	PFS (mon)	Status PFS	Maximal Resec	Gy	Plan Gy	Gy Plan followed	TMZ until end of Radiation?	TMZ planned	Full TMZ	60 Gy CRT-Planned?	60 Gy Success	CRT-Failed	Boosted?	Start Adj-TMZ	Stupp≥6-cycles	MGMT	SoC
Resec	90	87.0281	2.00411	1			1	34	60	0	No	0	0	0	0	0	0	0	0	1	0
Resec	90	86.8775	8.80493	1	1.18275	1	1	40.05	40.05	1	All Days	1	0	0	0	0	0	1	0	1	0
Resec	90	83.9973	3.02259	1	1.77413	1	1	25	25	0	No	0	0	0	0	0	0	0	0	0	0
Resec	70	83.9535	7.95072	1	3.44969	1	1	60	60	1	No	0	0	0	0	0	0	0	0	1	0
Resec	80	82.9295	0.985626	1			1	0	0	0	No	0	0	0	0	0	0	0	0	1	0
Resec	80	81.7522	10.7762	1			1	24	60	0	Late TMZ	0	0	0	0	0	0	1	0	1	0
Resec	90	81.2512	4.20534	1	1.9384	1	1	40.05	40.05	1	All Days	1	0	0	0	0	0	1	0	1	0
Resec	80	80.6626	21.5524	1	15.6386	1	1	24	40.05	0	All Days	1	0	0	0	0	0	1	0	1	0
Resec	80	80.6571	13.6016	1	12.0246	1	1	40.05	40.05	1	All Days	1	0	0	0	0	0	1	0	1	0
Resec	90	80.104	2.89117	1	0.0985626	1	1	0	0	0	No	0	0	0	0	0	0	0	0	1	0
Resec	100	79.2498	24.4435	1			1	42	46/14	0	No	0	0	0	0	0	0	0	0	0	0
Resec	90	79.2334	2.82546	1			1	60	60	1	No	0	0	0	0	0	0	0	0	X	0
Resec	90	78.6585	5.15811	1	10.4148	1	1	60	60	1	Stopped TMZ	1	0	1	0	1	0	1	0	0	0
Resec	90	78.4203	1.11704	1			1	0	0	0	No	0	0	0	0	0	0	0	0	X	0
Resec	60	78.1629	18.1355	1			1	60	60	1	No	0	0	0	0	0	0	1	0	0	0
Resec	100	77.9986	60.9117	1			1	61	61	1	No	0	0	0	0	0	0	1	0	X	0
Resec	80	77.9767	3.18686	1	2.10267	1	1	0	0	0	No	0	0	0	0	0	0	0	0	0	0
Resec	90	77.9576	14.883	1	15.7043	1	1	60	60	1	Yes	1	1	1	1	0	0	1	1	0	1
Resec	40	77.6454	14.653	1	1.01848	1	1	0	0	0	No	0	0	0	0	0	0	0	0	X	0
Resec	80	76.7502	18.4641	1	56.3778	1	1	60	60	1	Yes	1	1	1	1	0	1	1	1	1	1
Resec	90	76.5038	16.0657	1	8.04928	1	1	30	60	0	No	0	0	0	0	0	0	0	0	X	0
Resec	90	76.386	15.2444	1	8.73922	1	1	60	60	1	Yes	1	1	1	1	0	0	1	1	0	1
Resec	100	76.0575	12.616	1	16.5585	1	1	60	60	1	Yes	1	1	1	1	0	0	1	1	1	1
Resec	90	75.9754	13.3717	1	12.1889	1	1	40.05	40.05	1	No	0	0	0	0	0	0	1	0	1	0
Resec	90	75.707	8.67351	1			1	50	60	0	No	0	0	0	0	0	0	0	0	X	0
Resec	50	75.6167	0.197125	1			1	0	0	0	No	0	0	0	0	0	0	0	0	0	0
Resec	90	75.4059	13.306	1			1	30	30	1	All days	1	0	0	0	0	0	0	0	X	0
Resec	90	75.0828	27.4004	1	9.65914	1	1	60	60	1	Yes	1	1	1	1	0	0	1	1	1	1
Resec	80	75.0198	21.6509	1			1	60	60	1	Yes	1	1	1	1	0	0	1	0	1	0
Resec	80	74.9678	7.91786	1	7.55647	1	1	40.05	40.05	1	Stopped TMZ	1	0	0	0	0	0	0	0	0	0
Resec	80	74.5544	16	1	17.9713	1	1	60	60	1	Yes	1	1	1	1	0	1	1	1	0	1
Resec	90	74.3628	17.4784	1	4.3039	1	1	60	60	1	Yes	1	1	1	1	0	0	0	0	0	0
Resec	60	73.7084	6.17659	1	12.6817	1	1	60	60	1	Yes	1	1	1	1	0	0	0	0	1	0
Resec	80	73.5441	8.67351	1	5.4538	1	1	60	60	1	Yes	1	1	1	1	0	1	0	0	0	0
Resec	80	73.5332	2.06982	1			1	40.05	40.05	1	No	0	0	0	0	0	0	0	0	0	0
Resec	100	72.794	2.7269	1			1	0	0	0	No	0	0	0	0	0	0	0	0	0	0
Resec	90	72.6762	9.46201	1	1.37988	1	1	60	60	1	Yes	1	1	1	1	0	0	0	0	0	0
Resec	80	72.5284	7.68789	1	8.21355	1	1	60	60	1	Yes	1	1	1	1	0	0	1	1	x	1
Resec	70	72.5202	3.71253	1			1	45	45	1	No	0	0	0	0	0	0	0	0	0	0
Resec	90	72.4216	15.5729	1	1.90554	1	1	60	60	1	Yes	1	1	1	1	0	1	1	0	0	0
Resec	90	72.3943	5.74949	1	2.16838	1	1	0	0	0	No	0	0	0	0	0	0	0	0	0	0
Resec	80	72.2738	5.97947	1			1	0	0	0	No	0	0	0	0	0	0	0	0	0	0
Resec	50	72.2053	0.821355	1			1	0	0	0	No	0	0	0	0	0	0	0	0	X	0
Resec	90	71.9151	4.76386	1			1	40.05	40.05	1	No	0	0	0	0	0	0	0	0	X	0
Resec	80	71.4716	0.492813	1			1	0	0	0	No	0	0	0	0	0	0	0	0	1	0
Resec	90	71.2717	2.75975	1	30.1273	1	1	60	60	1	Yes	1	1	1	1	0	0	1	1	1	1
Resec	100	71.1814	40.6735	1	1.90554	1	1	60	60	1	Yes	1	1	1	1	0	1	1	0	0	0
Resec	90	71.1431	19.1869	1	11.8604	1	1	60	60	1	Yes	1	1	1	1	0	0	1	1	0	1
Resec	90	71.0801	3.02259	1	12.1889	1	1	60	60	1	No	0	0	0	0	0	0	0	0	X	0
Resec	90	70.8337	28.8789	1	20.0739	1	1	60	60	1	Yes	1	1	1	1	0	1	1	1	0	1
Resec	80	70.82	3.94251	1			1	40.05	40.05	1	All Days	1	0	0	0	0	0	1	0	0	0
Resec	100	70.705	24.5421	1	7.8193	1	1	60	60	1	Yes	1	1	1	1	0	0	1	0	x	0
Resec	90	70.6667	27.6632	1	24.1807	1	1	60	60	1	Yes	1	1	1	1	0	0	1	1	1	1
Resec	80	70.4887	6.6037	1	9.56057	1	1	60	60	1	Yes	1	1	1	1	0	0	1	1	0	1
Resec	80	70.2505	15.5072	1	6.93224	1	1	60	60	1	Yes	1	1	1	1	0	0	1	1	0	1
Resec	100	70.204	16.1643	1	6.63655	1	1	60	60	1	No	0	0	0	0	0	0	0	0	0	0
Resec	90	70.1355	40.3778	1	4.07392	1	1	60	60	1	Yes	1	1	1	1	0	0	0	0	0	0
Resec	90	70.1136	14.6201	1	7.35934	1	1	60	60	1	Yes	1	1	1	1	0	0	1	0	0	0
Resec	70	69.8645	13.2731	1	24.6407	1	1	60	60	1	Yes	1	1	1	1	0	1	1	1	1	1
Resec	100	69.7823	38.5051	1	9.98768	1	1	60	60	1	Yes	1	1	1	1	0	0	1	1	0	1
Resec	80	69.744	17.5113	1	6.73511	1	1	60	60	1	Yes	1	1	1	1	0	1	1	0	1	0
Resec	80	69.5825	0.919918	1			1	0	0	0	No	0	0	0	0	0	0	0	0	0	0
Resec	70	69.5606	39.7207	1	23.9836	1	1	60	60	1	Yes	1	1	1	1	0	0	1	1	1	1
Resec	80	69.3333	15.9671	1	12.6489	1	1	40.05	40.05	1	All Days	1	0	0	0	0	0	1	0	0	0
Resec	80	69.2841	5.32238	1			1	0	0	0	No	0	0	0	0	0	0	0	0	0	0
Resec	100	69.0623	12.0246	1	12.386	1	1	60	60	1	Yes	1	1	1	1	0	0	1	1	0	1
Resec	80	68.6051	4.20534	1			1	0	0	0	No	0	0	0	0	0	0	0	0	1	0
Resec	90	68.4052	28.4517	1	37.1253	1	1	60	60	1	Yes	1	1	1	1	0	0	1	0	0	0
Resec	80	68.2793	9.69199	1			1	0	0	0	No	0	0	0	0	0	0	0	0	1	0
Resec	80	68.2765	12.386	1	6.6037	1	1	60	60	1	Yes	1	1	1	1	0	0	1	0	1	0
Resec	70	68.2327	24.0493	1	16.0986	1	1	60	60	1	Yes	1	1	1	1	0	0	1	1	0	1
Resec	80	68.1068	21.3881	1	11.6632	1	1	60	60	1	Yes	1	1	1	1	0	0	1	1	1	1
Resec	90	67.6496	17.0185	1	11.9918	1	1	60	60	1	Yes	1	1	1	1	0	0	1	0	1	0
Resec	80	67.6249	12.4189	1			1	60	60	1	No	0	0	0	0	0	0	1	0	1	0
Resec	80	67.5811	15.9014	1	7.95072	1	1	60	60	1	Yes	1	1	1	1	0	0	1	1	0	1
Resec	80	67.2361	9.72485	1	3.41684	1	1	60	60	1	Yes	1	1	1	1	0	0	1	1	1	1
Resec	90	67.0308	9.72485	1	6.30801	1	1	60	60	1	Yes	1	1	1	1	0	0	1	0	1	0
Resec	80	66.9405	40.6407	1	8.9692	1	1	60	60	1	Yes	1	1	1	1	0	0	1	0	0	0
Resec	90	66.8939	25.1006	1	8.31211	1	1	60	60	1	Yes	1	1	1	1	0	0	1	0	1	0
Resec	90	66.7762	22.308	1	23.5565	1	1	60	60	1	Yes	1	1	1	1	0	1	1	1	1	1
Resec	70	66.6968	9.88912	1	21.5852	1	1	60	60	1	Yes	1	1	1	1	0	1	1	1	0	1
Resec	70	66.59	1.577	1			1	0	0	0	No	0	0	0	0	0	0	0	0	0	0
Resec	100	66.5654	27.6632	1	7.58932	1	1	60	60	1	Yes	1	1	1	1	0	1	1	0	0	0
Resec	100	66.5435	54.9651	1	8.6078	1	1	60	60	1	Yes	1	1	1	1	0	0	1	1	1	1
Resec	60	66.3326	35.8768	1	8.70637	1	1	60	60	1	Yes	1	1	1	1	0	1	1	1	1	1
Resec	80	66.2669	29.9959	1			1	30	30	1	All Days	1	0	0	0	0	0	1	0	1	0
Resec	70	65.8535	23.2936	0	38.2094	1	1	60	60	1	Yes	1	1	1	1	0	0	1	1	1	1
Resec	90	65.8042	42.1191	1	30.3573	1	1	60	60	1	Yes	1	1	1	1	0	1	1	1	1	1
Resec	80	65.7194	8.54209	1	14.0616	1	1	60	60	1	Yes	1	1	1	1	0	1	1	1	1	1
Resec	80	65.6537	25.5606	1	36.271	1	1	60	60	1	Yes	1	1	1	1	0	1	1	1	1	1
Resec	90	65.5469	17.117	1	6.6037	1	1	60	60	1	Yes	1	1	1	1	0	0	0	0	0	0
Resec	70	65.4648	17.7413	1	1.51129	1	1	60	60	1	Yes	1	1	1	1	0	0	1	0	1	0
Resec	90	65.1581	10.2177	1	4.43532	1	1	60	60	1	Yes	1	1	1	1	0	0	1	1	0	1
Resec	90	65.1116	8.90349	1	8.77207	1	1	60	60	1	Yes	1	1	1	1	0	0	1	0	0	0
Resec	60	64.95	4.07392	1	3.02259	1	1	0	0	0	No	0	0	0	0	0	0	0	0	X	0
Resec	90	64.6489	9.65914	1	6.89938	1	1	60	60	1	Yes	1	1	1	1	0	0	0	0	x	0
Resec	100	64.5585	16.23	1	4.40246	1	1	60	60	1	Yes	1	1	1	1	0	0	0	0	0	0
Resec	100	64.4709	25.7906	1			1	42	60	0	All Days	1	0	1	0	1	0	1	0	X	0
Resec	70	64.4682	15.54	1	16.3614	1	1	60	60	1	Yes	1	1	1	1	0	0	0	0	0	0
Resec	80	64.4408	38.7023	1	15.7372	1	1	60	60	1	Yes	1	1	1	1	0	1	1	1	0	1
Resec	60	64.3669	13.5688	1	8.24641	1	1	60	60	1	Yes	1	1	1	1	0	0	1	1	1	1
Resec	100	64.2656	15.4415	1	14.5216	1	1	60	60	1	Yes	1	1	1	1	0	0	1	1	1	1
Resec	80	64.2272	23.9179	1	4.04107	1	1	60	60	1	Yes	1	1	1	1	0	0	1	0	0	0
Resec	80	64.1095	6.11088	1			1	50	50	1	No	0	0	0	0	0	0	1	0	1	0
Resec	80	64.1068	7.22793	1	8.77207	1	1	60	60	1	Stopped TMZ	1	0	1	0	1	0	1	0	0	0
Resec	80	64.0137	30.193	1	9.36345	1	1	60	60	1	Yes	1	1	1	1	0	0	1	0	0	0
Resec	100	63.948	45.1088	1	17.9384	1	1	60	60	1	Yes	1	1	1	1	0	0	1	1	1	1
Resec	80	63.8631	28.9774	1	32.1314	1	1	60	60	1	Yes	1	1	1	1	0	1	1	1	1	1
Resec	90	63.8275	27.4661	1			1	60	60	1	Yes	1	1	1	1	0	0	1	0	0	0
Resec	80	63.8248	38.8337	1	22.4066	1	1	60	60	1	Yes	1	1	1	1	0	0	1	1	0	1
Resec	100	63.729	31.3429	1	18.8912	1	1	60	60	1	Yes	1	1	1	1	0	1	1	1	0	1
Resec	80	63.5127	5.51951	1			1	60	60	1	Stopped TMZ	1	0	1	0	1	0	1	0	0	0
Resec	50	63.436	25.2977	1	29.7331	1	1	60	60	1	Yes	1	1	1	1	0	1	1	1	1	1
Resec	80	63.269	29.9959	1	24.2464	1	1	60	60	1	Yes	1	1	1	1	0	1	1	1	1	1
Resec	70	63.091	18.2012	1	2.69405	1	1	60	60	1	Yes	1	1	1	1	0	1	0	0	1	0
Resec	90	62.9213	14.2587	1	4.89528	1	1	60	60	1	Yes	1	1	1	1	0	1	1	1	0	1
Resec	90	62.8392	22.6694	1	3.48255	1	1	60	60	1	Yes	1	1	1	1	0	0	1	0	0	0
Resec	90	62.768	47.6386	1	5.35524	1	1	60	60	1	Stopped TMZ	1	0	1	0	1	0	1	0	1	0
Resec	80	62.7406	14.0287	1	9.95483	1	1	60	60	1	Yes	1	1	1	1	0	0	1	1	0	1
Resec	60	62.6886	0.689938	1	0.525667	1	1	0	0	0	No	0	0	0	0	0	0	0	0	1	0
Resec	100	62.538	10.7105	1	3.02259	1	1	60	60	1	Yes	1	1	1	1	0	0	1	1	0	1
Resec	90	62.1656	17.8727	1	6.07803	1	1	60	60	1	Yes	1	1	1	1	0	0	1	0	1	0
Resec	90	61.9357	11.9589	1	5.68378	1	1	60	60	1	Yes	1	1	1	1	0	1	1	1	0	1
Resec	60	61.9274	1.28131	1	0.657084	1	1	0	0	0	No	0	0	0	0	0	0	0	0	1	0
Resec	100	61.807	29.8645	1			1	60	60	1	Yes	1	1	1	1	0	0	1	0	0	0
Resec	70	61.7522	21.2895	1	7.58932	1	1	60	60	1	Yes	1	1	1	1	0	0	0	0	1	0
Resec	100	61.7029	38.9322	1	13.076	1	1	60	60	1	Yes	1	1	1	1	0	1	1	1	1	1
Resec	70	61.6701	7.0308	1	7.55647	1	1	60	60	1	Yes	1	1	1	1	0	1	1	1	0	1
Resec	80	61.6591	14.8172	0	38.9322	0	1	60	60	1	Yes	1	1	1	1	0	1	1	1	1	1
Resec	90	61.5633	9.03491	1	3.64682	1	1	60	60	1	Yes	1	1	1	1	0	0	1	0	1	0
Resec	100	61.5469	37.5195	1	11.5647	1	1	60	60	1	Yes	1	1	1	1	0	0	1	1	1	1
Resec	80	61.514	35.8439	1	2.92402	1	1	60	60	1	Yes	1	1	1	1	0	0	1	0	0	0
Resec	90	61.5031	67.2526	1	29.7331	1	1	60	60	1	Yes	1	1	1	1	0	0	1	1	0	1
Resec	80	61.3771	3.35113	1	21.2895	1	1	60	60	1	Yes	1	1	1	1	0	1	1	1	1	1
Resec	70	61.2539	9.16632	0	67.2526	0	1	60	60	1	Yes	1	1	1	1	0	0	1	1	1	1
Resec		60.9144	5.25667	1	5.15811	1	1	0	0	0	No	0	0	0	0	0	0	1	0	0	0
Resec	60	60.8953	12.4189	1	1.87269	1	1	60	60	1	Yes	1	1	1	1	0	0	0	0	0	0
Resec	80	60.8734	15.9343	1	3.90965	1	1	60	60	1	Yes	1	1	1	1	0	0	0	0	0	0
Resec	70	60.8159	20.3696	1	10.1848	1	1	60	60	1	Yes	1	1	1	1	0	1	1	1	0	1
Resec		60.7584	102.834	1			1	60	60	1	No	0	0	0	0	0	0	0	0	X	0
Resec	100	60.2628	39.5236	1	9.23203	1	1	60	60	1	Yes	1	1	1	1	0	1	1	1	x	1
Resec	90	60	13.5359	1	17.8398	1	1	60	60	1	Yes	1	1	1	1	0	1	1	0	0	0
Resec	100	59.9535	20.7967	1	33.0185	1	1	60	60	1	Yes	1	1	1	1	0	0	1	1	0	1
Resec	100	59.9507	28.3532	1	12.2546	1	1	60	60	1	Yes	1	1	1	1	0	0	1	1	0	1
Resec		59.4168	4.10678	1	3.38398	1	1	60	60	1	Stopped TMZ	1	0	1	0	1	0	1	0	0	0
Resec	80	59.4059	15.3429	1	3.25257	1	1	60	60	1	Yes	1	1	1	1	0	0	0	0	1	0
Resec	60	59.2608	0.821355	1			1	0	0	0	No	0	0	0	0	0	0	1	0	X	0
Resec	90	59.1567	38.4066	1	11.729	1	1	60	60	1	Yes	1	1	1	1	0	0	1	1	1	1
Resec	70	58.9569	20.6653	1	6.50513	1	1	60	60	1	Yes	1	1	1	1	0	0	1	0	0	0
Resec	90	58.9514	30.9487	0	19.9097	1	1	60	60	1	Yes	1	1	1	1	0	0	1	1	1	1
Resec	70	58.8939	5.78234	1	11.6304	1	1	60	60	1	Yes	1	1	1	1	0	1	1	1	1	1
Resec		58.5325	10.1848	1	46.2587	1	1	48.5	60	0	Stopped TMZ	1	0	1	0	1	0	0	0	X	0
Resec	80	58.3135	9.3963	1	5.05955	1	1	60	60	1	Yes	1	1	1	1	0	0	1	0	0	0
Resec	90	58.3107	8.01643	1	4.89528	1	1	60	60	1	Yes	1	1	1	1	0	0	0	0	0	0
Resec	90	58.2478	12.9117	1	4.36961	1	1	60	60	1	Yes	1	1	1	1	0	1	1	0	0	0
Resec	90	58.1875	6.89938	1	2.59548	1	1	60	60	1	Yes	1	1	1	1	0	0	1	0	0	0
Resec		58.1465	13.2074	1			1	60	60	1	Stopped TMZ	1	0	1	0	1	0	1	0	1	0
Resec	100	57.9165	30.7844	1	6.01232	1	1	60	60	1	Yes	1	1	1	1	0	1	1	1	0	1
Resec	100	57.8535	67.5154	1	3.48255	1	1	60	60	1	Yes	1	1	1	1	0	0	1	0	0	0
Resec	70	57.796	14.2916	1	20.6982	1	1	60	60	1	Yes	1	1	1	1	0	0	1	1	1	1
Resec		57.5332	2.69405	1	2.92402	1	1	50	60	0	Stopped TMZ	1	0	1	0	1	0	0	0	0	0
Resec	90	57.4976	23.6222	1	55.7864	1	1	60	60	1	Yes	1	1	1	1	0	1	1	1	1	1
Resec	70	57.4264	22.5708	1	9.13347	1	1	60	60	1	Yes	1	1	1	1	0	0	1	1	1	1
Resec	90	57.3196	12.5503	1	17.8398	1	1	60	60	1	Yes	1	1	1	1	0	0	1	1	1	1
Resec	70	57.0376	19.9097	1	5.71663	1	1	60	60	1	Yes	1	1	1	1	0	0	1	1	1	1
Resec	80	56.7474	10.4805	1	11.0719	1	1	60	60	1	Yes	1	1	1	1	0	0	1	0	0	0
Resec	70	56.731	18.4312	1	17.347	1	1	60	60	1	Yes	1	1	1	1	0	0	1	1	1	1
Resec	70	56.6762	17.6427	1	7.52361	1	1	60	60	1	Yes	1	1	1	1	0	1	1	0	0	0
Resec	80	56.6242	41.232	1	12.4189	1	1	60	60	1	Yes	1	1	1	1	0	1	1	1	0	1
Resec		56.4244	6.07803	1	2.10267	1	1	58	60	1	Stopped TMZ	1	0	1	0	1	0	1	0	0	0
Resec	90	56.386	19.4497	1	1.87269	1	1	60	60	1	Yes	1	1	1	1	0	1	1	1	0	1
Resec	90	56.3176	10.6119	0	41.232	0	1	60	60	1	Yes	1	1	1	1	0	1	1	1	1	1
Resec	70	56.293	27.7618	1	9.10062	1	1	60	60	1	Yes	1	1	1	1	0	0	1	1	0	1
Resec	90	56.2245	8.73922	1	9.85626	1	1	60	60	1	Yes	1	1	1	1	0	0	1	0	1	0
Resec	90	56.1944	30.7844	1	6.89938	1	1	60	60	1	Yes	1	1	1	1	0	0	1	0	1	0
Resec	70	55.9206	26.8419	1	5.91376	1	1	60	60	1	Yes	1	1	1	1	0	0	1	0	1	0
Resec	90	55.9179	21.5195	1	25.5277	1	1	60	60	1	Yes	1	1	1	1	0	0	1	1	1	1
Resec	80	55.8056	12.9446	1	3.154	1	1	60	60	1	Yes	1	1	1	1	0	1	1	0	1	0
Resec	80	55.7207	12.2218	1	9.3306	1	1	60	60	1	Yes	1	1	1	1	0	0	1	1	0	1
Resec	100	55.6961	25.1992	1	4.13963	1	1	60	60	1	Yes	1	1	1	1	0	1	1	1	0	1
Resec	80	55.666	47.4415	1	8.14784	1	1	60	60	1	Yes	1	1	1	1	0	0	1	0	0	0
Resec	90	55.6468	37.4538	1	3.44969	1	1	60	60	1	Yes	1	1	1	1	0	0	1	1	0	1
Resec	90	55.5948	38.2423	0	37.8809	1	1	60	60	1	Yes	1	1	1	1	0	1	1	1	1	1
Resec	90	55.3457	41.4949	1	28.0246	1	1	60	60	1	Yes	1	1	1	1	0	1	1	1	1	1
Resec	70	55.0116	52.4025	1	28.0575	1	1	60	60	1	Yes	1	1	1	1	0	0	1	1	1	1
Resec	80	54.9733	11.0062	1	28.846	1	1	60	60	1	Yes	1	1	1	1	0	1	1	1	1	1
Resec	80	54.6366	3.94251	1	2.3655	1	1	30	30	1	No	0	0	0	0	0	0	0	0	0	0
Resec	100	54.5654	8.83778	1	42.5133	1	1	60	60	1	Yes	1	1	1	1	0	1	1	1	1	1
Resec	100	54.2533	39.8193	1	9.98768	1	1	60	60	1	Yes	1	1	1	1	0	1	1	1	0	1
Resec		54.1821	25.3634	1	3.58111	1	1	54	60	0	No	0	0	0	0	0	0	1	0	0	0
Resec	90	54.0643	19.4168	1	3.41684	1	1	60	60	1	Yes	1	1	1	1	0	1	1	0	1	0
Resec	80	53.911	13.8645	1	23.3922	1	1	60	60	1	Yes	1	1	1	1	0	1	1	1	1	1
Resec	90	53.6537	20.6324	1	8.54209	1	1	60	60	1	Yes	1	1	1	1	0	0	1	0	1	0
Resec		53.6235	13.2731	1	12.5503	1	1	45	45	1	No	0	0	0	0	0	0	1	0	X	0
Resec		53.6235	4.40246	1	4.27105	1	1	40.5	40.5	1	No	0	0	0	0	0	0	1	0	0	0
Resec	90	53.5222	18.8912	1	5.35524	1	1	60	60	1	Yes	1	1	1	1	0	1	1	0	0	0
Resec	70	53.3196	35.6468	1	7.72074	1	1	60	60	1	Yes	1	1	1	1	0	0	1	1	0	1
Resec	100	53.2868	18.3655	1	5.8809	1	1	60	60	1	Yes	1	1	1	1	0	0	1	0	0	0
Resec	90	52.898	14.3901	1	15.6057	1	1	60	60	1	Yes	1	1	1	1	0	1	1	0	1	0
Resec	90	52.6626	41.232	1	5.38809	1	1	60	60	1	Yes	1	1	1	1	0	0	1	1	0	1
Resec	60	52.4983	7.45791	1	4.6653	1	1	60	60	1	Yes	1	1	1	1	0	0	0	0	0	0
Resec		52.4654	11.0719	1			1	43	60	0	No	0	0	0	0	0	0	0	0	0	0
Resec	90	52.3039	5.61807	1	26.9733	1	1	60	60	1	Yes	1	1	1	1	0	1	1	1	1	1
Resec	100	52.2108	4.89528	1	3.05544	1	1	60	60	1	Yes	1	1	1	1	0	0	1	0	1	0
Resec	90	52.1424	22.4723	1	4.56674	1	1	60	60	1	Yes	1	1	1	1	0	0	0	0	0	0
Resec	90	52.011	38.1766	1	2.03696	1	1	60	60	1	Yes	1	1	1	1	0	0	1	0	1	0
Resec	70	51.666	13.0103	1	12.7146	1	1	60	60	1	Yes	1	1	1	1	0	0	1	0	0	0
Resec	100	51.4825	29.7331	0	28.3203	1	1	60	60	1	Yes	1	1	1	1	0	0	1	1	1	1
Resec	70	50.9569	12.5175	1	9.16632	1	1	60	60	1	Yes	1	1	1	1	0	0	1	0	0	0
Resec	90	50.7789	11.0062	1	2.85832	1	1	60	60	1	Yes	1	1	1	1	0	0	1	1	1	1
Resec	90	50.1711	16.8542	1	8.37782	1	1	60	60	1	Yes	1	1	1	1	0	0	1	1	1	1
Resec	90	50.0424	18.3984	1	9.62628	1	1	60	60	1	Yes	1	1	1	1	0	0	1	0	0	0
Resec	100	49.963	39.1294	1	7.16222	1	1	60	60	1	Yes	1	1	1	1	0	1	1	1	0	1
Resec	90	49.8864	16.1971	1	8.54209	1	1	60	60	1	Yes	1	1	1	1	0	1	1	0	0	0
Resec	80	49.8097	14.9158	0	39.1294	0	1	60	60	1	Yes	1	1	1	1	0	0	1	1	0	1
Resec	80	49.4921	29.0431	1	4.50103	1	1	60	60	1	Yes	1	1	1	1	0	1	1	0	0	0
Resec	90	49.399	16.3614	1	5.65092	1	1	60	60	1	Yes	1	1	1	1	0	1	1	0	0	0
Resec	70	48.961	18.0698	1	5.22382	1	1	60	60	1	Yes	1	1	1	1	0	0	1	0	1	0
Resec		48.5476	39.9507	1			1	60	60	1	Stopped TMZ	1	0	1	0	1	0	1	0	1	0
Resec	90	48.3368	15.8686	1	8.01643	1	1	60	60	1	Yes	1	1	1	1	0	0	1	1	1	1
Resec	70	47.4552	8.24641	1	3.28542	1	1	60	60	1	Yes	1	1	1	1	0	0	1	1	0	1
Resec	100	46.9979	48.8214	1	0.985626	1	1	60	60	1	Yes	1	1	1	1	0	1	0	0	0	0
Resec	90	46.3765	14.0945	1	5.4538	1	1	60	60	1	Yes	1	1	1	1	0	0	1	0	0	0
Resec	80	45.7906	10.3491	0	11.4004	1	1	60	60	1	Yes	1	1	1	1	0	1	1	1	1	1
Resec	90	44.9062	24.2464	1	5.58522	1	1	60	60	1	Yes	1	1	1	1	0	0	1	1	0	1
Resec	80	44.8679	4.36961	1	5.28953	1	1	60	60	1	Yes	1	1	1	1	0	1	0	0	0	0
Resec	100	44.6543	27.6304	1	14.7187	1	1	60	60	1	Yes	1	1	1	1	0	0	1	1	0	1
Resec	x	44.4408	31.8029	1	2.69405	1	1	60	60	1	Yes	1	1	1	1	0	0	0	0	0	0
Resec	90	44.3559	10.7762	1	6.89938	1	1	60	60	1	Yes	1	1	1	1	0	0	1	0	0	0
Resec	90	44.1643	5.0924	1	11.5975	1	1	60	60	1	Yes	1	1	1	1	0	0	1	0	x	0
Resec	70	41.7139	14.6201	1	2.06982	1	1	60	60	1	Yes	1	1	1	1	0	0	0	0	1	0
Resec	90	40.397	12.5175	1	2.52977	1	1	60	60	1	Yes	1	1	1	1	0	1	1	0	0	0
Resec	100	39.7016	17.8398	1	10.2505	1	1	60	60	1	Yes	1	1	1	1	0	0	1	1	0	1
Resec		38.8884	13.0103	1			1	0	0	0	No	0	0	0	0	0	0	0	0	0	0
Resec	70	38.883	24.115	1	11.2033	1	1	60	60	1	Yes	1	1	1	1	0	0	1	0	0	0
Resec	90	38.1848	36.7967	1	14.4887	1	1	60	60	1	Yes	1	1	1	1	0	1	1	1	0	1
Resec	60	34.5298	21.2567	1	8.93634	1	1	60	60	1	Yes	1	1	1	1	0	0	1	0	0	0
Resec	100	30.4668	15.2772	1	15.4743	1	1	60	60	1	Yes	1	1	1	1	0	0	1	1	1	1
Resec	90	30.2916	36.5996	1	19.7782	1	1	60	60	1	Yes	1	1	1	1	0	0	1	1	1	1
Biop	80	86.7844	7.26078	1			0	0	0	0	No	0	0	0	0	0	0	0	0	x	0
Biop	50	83.5674	10.1848	1	9.62628	1	0	50	50	0	No	0	0	0	0	0	0	0	0	1	0
Biop	70	79.7207	3.71253	1			0	0	0	0	No	0	0	0	0	0	0	0	0	1	0
Biop	90	79.0883	0.689938	1			0	0	0	0	No	0	0	0	0	0	0	0	0	0	0
Biop	50	78.8063	6.6694	1	5.38809	1	0	40.05	40.05	1	All Days	1	0	0	0	0	0	1	0	1	0
Biop	80	77.8645	0.657084	1			0	22	40.05	0	No	0	0	0	0	0	0	0	0	1	0
Biop	50	77.4538	0.558522	1			0	0	0	0	No	0	0	0	0	0	0	0	0	x	0
Biop	80	77.4045	32.9528	1	31.7372	1	0	30	30	1	No	0	0	0	0	0	0	1	0	x	0
Biop	60	76.7748	2.03696	1			0	0	0	0	No	0	0	0	0	0	0	1	0	x	0
Biop	80	76.0082	6.70226	1	12.5175	1	0	60	60	1	Yes	1	1	1	1	0	0	1	1	0	1
Biop	100	75.6851	2.75975	1			0	50	50	1	All Days	1	0	0	0	0	0	1	0	x	0
Biop	80	75.5483	2.39836	1			0	0	0	0	No	0	0	0	0	0	0	0	0	0	0
Biop	80	74.0507	3.02259	1			0	0	0	0	No	0	0	0	0	0	0	0	0	0	0
Biop	60	73.0979	3.58111	1			0	22	40.05	0	No	0	0	0	0	0	0	0	0	x	0
Biop	40	72.0329	4.40246	1			0	0	0	0	No	0	0	0	0	0	0	0	0	0	0
Biop	80	70.1109	6.40657	1			0	0	0	0	No	0	0	0	0	0	0	0	0	0	0
Biop	90	69.4209	10.1191	1	9.23203	1	0	50	50	0	No	0	0	0	0	0	0	1	0	1	0
Biop	80	66.3053	7.26078	1	9.82341	1	0	59.4	59.4	1	Stopped TMZ	1	0	1	0	1	0	1	0	0	0
Biop	90	64.8953	19.8768	1	4.10678	1	0	60	60	1	Yes	1	1	1	1	0	1	1	0	0	0
Biop	80	63.8741	8.54209	1	15.3758	1	0	60	60	1	Yes	1	1	1	1	0	0	1	1	0	1
Biop	90	63.7481	5.19097	1	25.3634	1	0	50	60	0	Stopped TMZ	1	0	1	0	1	0	1	0	1	0
Biop	100	62.36	23.3593	1			0	60	60	1	3-weeks TMZ	1	0	1	0	1	0	1	0	1	0
Biop	80	62.0643	4.82957	1	6.43943	1	0	60	60	1	Yes	1	1	1	1	0	1	1	0	0	0
Biop	50	59.4004	0.394251	1			0	0	0	0	No	0	0	0	0	0	0	0	0	x	0
Biop	90	58.4367	8.37782	1			0	40.05	40.05	1	All Days	1	0	0	0	0	0	0	0	0	0
Biop	50	51.4415	13.1745	1	10.7433	1	0	40.05	40.05	1	All Days	1	0	0	0	0	1	0	0	0	0
Biop	90	50.1191	12.0246	1	21.6838	1	0	60	60	1	3-weeks TMZ	1	0	1	0	1	0	1	0	0	0
Biop	90	44.898	11.039	1	6.20945	1	0	30	30	1	All Days	1	0	0	0	0	0	0	0	x	0
Biop	90	41.9329	2.29979	1			0	0	0	0	No	0	0	0	0	0	0	1	0	x	0
Biop	100	30.2861	9.23203	1	8.08214	1	0	60	60	1	Yes	1	1	1	1	0	0	1	1	1	1

## Sheet: All resected rad stat
Resec/Biopsy	KPS	Age	OS (mon)	Status	PFS (mon)	Status PFS	Maximal Resec	Gy	Plan Gy	Gy Plan followed	TMZ until end of Radiation?	TMZ planned	Full TMZ	60 Gy CRT-Planned?	60 Gy Success	CRT-Failed	Boosted?	Start Adj-TMZ	Stupp≥6-cycles	MGMT	SoC
Resec	90	87.0281	2.00411	1			1	34	60	0	No	0	0	0	0	0	0	0	0	1	0
Resec	90	86.8775	8.80493	1	1.18275	1	1	40.05	40.05	1	All Days	1	0	0	0	0	0	1	0	1	0
Resec	90	83.9973	3.02259	1	1.77413	1	1	25	25	0	No	0	0	0	0	0	0	0	0	0	0
Resec	70	83.9535	7.95072	1	3.44969	1	1	60	60	1	No	0	0	0	0	0	0	0	0	1	0
Resec	80	82.9295	0.985626	1			1	0	0	0	No	0	0	0	0	0	0	0	0	1	0
Resec	80	81.7522	10.7762	1			1	24	60	0	Late TMZ	0	0	0	0	0	0	1	0	1	0
Resec	90	81.2512	4.20534	1	1.9384	1	1	40.05	40.05	1	All Days	1	0	0	0	0	0	1	0	1	0
Resec	80	80.6626	21.5524	1	15.6386	1	1	24	40.05	0	All Days	1	0	0	0	0	0	1	0	1	0
Resec	80	80.6571	13.6016	1	12.0246	1	1	40.05	40.05	1	All Days	1	0	0	0	0	0	1	0	1	0
Resec	90	80.104	2.89117	1	0.0985626	1	1	0	0	0	No	0	0	0	0	0	0	0	0	1	0
Resec	100	79.2498	24.4435	1			1	42	46/14	0	No	0	0	0	0	0	0	0	0	0	0
Resec	90	79.2334	2.82546	1			1	60	60	1	No	0	0	0	0	0	0	0	0	X	0
Resec	90	78.6585	5.15811	1	10.4148	1	1	60	60	1	Stopped TMZ	1	0	1	0	1	0	1	0	0	0
Resec	90	78.4203	1.11704	1			1	0	0	0	No	0	0	0	0	0	0	0	0	X	0
Resec	60	78.1629	18.1355	1			1	60	60	1	No	0	0	0	0	0	0	1	0	0	0
Resec	100	77.9986	60.9117	1			1	61	61	1	No	0	0	0	0	0	0	1	0	X	0
Resec	80	77.9767	3.18686	1	2.10267	1	1	0	0	0	No	0	0	0	0	0	0	0	0	0	0
Resec	90	77.9576	14.883	1	15.7043	1	1	60	60	1	Yes	1	1	1	1	0	0	1	1	0	1
Resec	40	77.6454	14.653	1	1.01848	1	1	0	0	0	No	0	0	0	0	0	0	0	0	X	0
Resec	80	76.7502	18.4641	1	56.3778	1	1	60	60	1	Yes	1	1	1	1	0	1	1	1	1	1
Resec	90	76.5038	16.0657	1	8.04928	1	1	30	60	0	No	0	0	0	0	0	0	0	0	X	0
Resec	90	76.386	15.2444	1	8.73922	1	1	60	60	1	Yes	1	1	1	1	0	0	1	1	0	1
Resec	100	76.0575	12.616	1	16.5585	1	1	60	60	1	Yes	1	1	1	1	0	0	1	1	1	1
Resec	90	75.9754	13.3717	1	12.1889	1	1	40.05	40.05	1	No	0	0	0	0	0	0	1	0	1	0
Resec	90	75.707	8.67351	1			1	50	60	0	No	0	0	0	0	0	0	0	0	X	0
Resec	50	75.6167	0.197125	1			1	0	0	0	No	0	0	0	0	0	0	0	0	0	0
Resec	90	75.4059	13.306	1			1	30	30	1	All days	1	0	0	0	0	0	0	0	X	0
Resec	90	75.0828	27.4004	1	9.65914	1	1	60	60	1	Yes	1	1	1	1	0	0	1	1	1	1
Resec	80	75.0198	21.6509	1			1	60	60	1	Yes	1	1	1	1	0	0	1	0	1	0
Resec	80	74.9678	7.91786	1	7.55647	1	1	40.05	40.05	1	Stopped TMZ	1	0	0	0	0	0	0	0	0	0
Resec	80	74.5544	16	1	17.9713	1	1	60	60	1	Yes	1	1	1	1	0	1	1	1	0	1
Resec	90	74.3628	17.4784	1	4.3039	1	1	60	60	1	Yes	1	1	1	1	0	0	0	0	0	0
Resec	60	73.7084	6.17659	1	12.6817	1	1	60	60	1	Yes	1	1	1	1	0	0	0	0	1	0
Resec	80	73.5441	8.67351	1	5.4538	1	1	60	60	1	Yes	1	1	1	1	0	1	0	0	0	0
Resec	80	73.5332	2.06982	1			1	40.05	40.05	1	No	0	0	0	0	0	0	0	0	0	0
Resec	100	72.794	2.7269	1			1	0	0	0	No	0	0	0	0	0	0	0	0	0	0
Resec	90	72.6762	9.46201	1	1.37988	1	1	60	60	1	Yes	1	1	1	1	0	0	0	0	0	0
Resec	80	72.5284	7.68789	1	8.21355	1	1	60	60	1	Yes	1	1	1	1	0	0	1	1	x	1
Resec	70	72.5202	3.71253	1			1	45	45	1	No	0	0	0	0	0	0	0	0	0	0
Resec	90	72.4216	15.5729	1	1.90554	1	1	60	60	1	Yes	1	1	1	1	0	1	1	0	0	0
Resec	90	72.3943	5.74949	1	2.16838	1	1	0	0	0	No	0	0	0	0	0	0	0	0	0	0
Resec	80	72.2738	5.97947	1			1	0	0	0	No	0	0	0	0	0	0	0	0	0	0
Resec	50	72.2053	0.821355	1			1	0	0	0	No	0	0	0	0	0	0	0	0	X	0
Resec	90	71.9151	4.76386	1			1	40.05	40.05	1	No	0	0	0	0	0	0	0	0	X	0
Resec	80	71.4716	0.492813	1			1	0	0	0	No	0	0	0	0	0	0	0	0	1	0
Resec	90	71.2717	2.75975	1	30.1273	1	1	60	60	1	Yes	1	1	1	1	0	0	1	1	1	1
Resec	100	71.1814	40.6735	1	1.90554	1	1	60	60	1	Yes	1	1	1	1	0	1	1	0	0	0
Resec	90	71.1431	19.1869	1	11.8604	1	1	60	60	1	Yes	1	1	1	1	0	0	1	1	0	1
Resec	90	71.0801	3.02259	1	12.1889	1	1	60	60	1	No	0	0	0	0	0	0	0	0	X	0
Resec	90	70.8337	28.8789	1	20.0739	1	1	60	60	1	Yes	1	1	1	1	0	1	1	1	0	1
Resec	80	70.82	3.94251	1			1	40.05	40.05	1	All Days	1	0	0	0	0	0	1	0	0	0
Resec	100	70.705	24.5421	1	7.8193	1	1	60	60	1	Yes	1	1	1	1	0	0	1	0	x	0
Resec	90	70.6667	27.6632	1	24.1807	1	1	60	60	1	Yes	1	1	1	1	0	0	1	1	1	1
Resec	80	70.4887	6.6037	1	9.56057	1	1	60	60	1	Yes	1	1	1	1	0	0	1	1	0	1
Resec	80	70.2505	15.5072	1	6.93224	1	1	60	60	1	Yes	1	1	1	1	0	0	1	1	0	1
Resec	100	70.204	16.1643	1	6.63655	1	1	60	60	1	No	0	0	0	0	0	0	0	0	0	0
Resec	90	70.1355	40.3778	1	4.07392	1	1	60	60	1	Yes	1	1	1	1	0	0	0	0	0	0
Resec	90	70.1136	14.6201	1	7.35934	1	1	60	60	1	Yes	1	1	1	1	0	0	1	0	0	0
Resec	70	69.8645	13.2731	1	24.6407	1	1	60	60	1	Yes	1	1	1	1	0	1	1	1	1	1
Resec	100	69.7823	38.5051	1	9.98768	1	1	60	60	1	Yes	1	1	1	1	0	0	1	1	0	1
Resec	80	69.744	17.5113	1	6.73511	1	1	60	60	1	Yes	1	1	1	1	0	1	1	0	1	0
Resec	80	69.5825	0.919918	1			1	0	0	0	No	0	0	0	0	0	0	0	0	0	0
Resec	70	69.5606	39.7207	1	23.9836	1	1	60	60	1	Yes	1	1	1	1	0	0	1	1	1	1
Resec	80	69.3333	15.9671	1	12.6489	1	1	40.05	40.05	1	All Days	1	0	0	0	0	0	1	0	0	0
Resec	80	69.2841	5.32238	1			1	0	0	0	No	0	0	0	0	0	0	0	0	0	0
Resec	100	69.0623	12.0246	1	12.386	1	1	60	60	1	Yes	1	1	1	1	0	0	1	1	0	1
Resec	80	68.6051	4.20534	1			1	0	0	0	No	0	0	0	0	0	0	0	0	1	0
Resec	90	68.4052	28.4517	1	37.1253	1	1	60	60	1	Yes	1	1	1	1	0	0	1	0	0	0
Resec	80	68.2793	9.69199	1			1	0	0	0	No	0	0	0	0	0	0	0	0	1	0
Resec	80	68.2765	12.386	1	6.6037	1	1	60	60	1	Yes	1	1	1	1	0	0	1	0	1	0
Resec	70	68.2327	24.0493	1	16.0986	1	1	60	60	1	Yes	1	1	1	1	0	0	1	1	0	1
Resec	80	68.1068	21.3881	1	11.6632	1	1	60	60	1	Yes	1	1	1	1	0	0	1	1	1	1
Resec	90	67.6496	17.0185	1	11.9918	1	1	60	60	1	Yes	1	1	1	1	0	0	1	0	1	0
Resec	80	67.6249	12.4189	1			1	60	60	1	No	0	0	0	0	0	0	1	0	1	0
Resec	80	67.5811	15.9014	1	7.95072	1	1	60	60	1	Yes	1	1	1	1	0	0	1	1	0	1
Resec	80	67.2361	9.72485	1	3.41684	1	1	60	60	1	Yes	1	1	1	1	0	0	1	1	1	1
Resec	90	67.0308	9.72485	1	6.30801	1	1	60	60	1	Yes	1	1	1	1	0	0	1	0	1	0
Resec	80	66.9405	40.6407	1	8.9692	1	1	60	60	1	Yes	1	1	1	1	0	0	1	0	0	0
Resec	90	66.8939	25.1006	1	8.31211	1	1	60	60	1	Yes	1	1	1	1	0	0	1	0	1	0
Resec	90	66.7762	22.308	1	23.5565	1	1	60	60	1	Yes	1	1	1	1	0	1	1	1	1	1
Resec	70	66.6968	9.88912	1	21.5852	1	1	60	60	1	Yes	1	1	1	1	0	1	1	1	0	1
Resec	70	66.59	1.577	1			1	0	0	0	No	0	0	0	0	0	0	0	0	0	0
Resec	100	66.5654	27.6632	1	7.58932	1	1	60	60	1	Yes	1	1	1	1	0	1	1	0	0	0
Resec	100	66.5435	54.9651	1	8.6078	1	1	60	60	1	Yes	1	1	1	1	0	0	1	1	1	1
Resec	60	66.3326	35.8768	1	8.70637	1	1	60	60	1	Yes	1	1	1	1	0	1	1	1	1	1
Resec	80	66.2669	29.9959	1			1	30	30	1	All Days	1	0	0	0	0	0	1	0	1	0
Resec	70	65.8535	23.2936	0	38.2094	1	1	60	60	1	Yes	1	1	1	1	0	0	1	1	1	1
Resec	90	65.8042	42.1191	1	30.3573	1	1	60	60	1	Yes	1	1	1	1	0	1	1	1	1	1
Resec	80	65.7194	8.54209	1	14.0616	1	1	60	60	1	Yes	1	1	1	1	0	1	1	1	1	1
Resec	80	65.6537	25.5606	1	36.271	1	1	60	60	1	Yes	1	1	1	1	0	1	1	1	1	1
Resec	90	65.5469	17.117	1	6.6037	1	1	60	60	1	Yes	1	1	1	1	0	0	0	0	0	0
Resec	70	65.4648	17.7413	1	1.51129	1	1	60	60	1	Yes	1	1	1	1	0	0	1	0	1	0
Resec	90	65.1581	10.2177	1	4.43532	1	1	60	60	1	Yes	1	1	1	1	0	0	1	1	0	1
Resec	90	65.1116	8.90349	1	8.77207	1	1	60	60	1	Yes	1	1	1	1	0	0	1	0	0	0
Resec	60	64.95	4.07392	1	3.02259	1	1	0	0	0	No	0	0	0	0	0	0	0	0	X	0
Resec	90	64.6489	9.65914	1	6.89938	1	1	60	60	1	Yes	1	1	1	1	0	0	0	0	x	0
Resec	100	64.5585	16.23	1	4.40246	1	1	60	60	1	Yes	1	1	1	1	0	0	0	0	0	0
Resec	100	64.4709	25.7906	1			1	42	60	0	All Days	1	0	1	0	1	0	1	0	X	0
Resec	70	64.4682	15.54	1	16.3614	1	1	60	60	1	Yes	1	1	1	1	0	0	0	0	0	0
Resec	80	64.4408	38.7023	1	15.7372	1	1	60	60	1	Yes	1	1	1	1	0	1	1	1	0	1
Resec	60	64.3669	13.5688	1	8.24641	1	1	60	60	1	Yes	1	1	1	1	0	0	1	1	1	1
Resec	100	64.2656	15.4415	1	14.5216	1	1	60	60	1	Yes	1	1	1	1	0	0	1	1	1	1
Resec	80	64.2272	23.9179	1	4.04107	1	1	60	60	1	Yes	1	1	1	1	0	0	1	0	0	0
Resec	80	64.1095	6.11088	1			1	50	50	1	No	0	0	0	0	0	0	1	0	1	0
Resec	80	64.1068	7.22793	1	8.77207	1	1	60	60	1	Stopped TMZ	1	0	1	0	1	0	1	0	0	0
Resec	80	64.0137	30.193	1	9.36345	1	1	60	60	1	Yes	1	1	1	1	0	0	1	0	0	0
Resec	100	63.948	45.1088	1	17.9384	1	1	60	60	1	Yes	1	1	1	1	0	0	1	1	1	1
Resec	80	63.8631	28.9774	1	32.1314	1	1	60	60	1	Yes	1	1	1	1	0	1	1	1	1	1
Resec	90	63.8275	27.4661	1			1	60	60	1	Yes	1	1	1	1	0	0	1	0	0	0
Resec	80	63.8248	38.8337	1	22.4066	1	1	60	60	1	Yes	1	1	1	1	0	0	1	1	0	1
Resec	100	63.729	31.3429	1	18.8912	1	1	60	60	1	Yes	1	1	1	1	0	1	1	1	0	1
Resec	80	63.5127	5.51951	1			1	60	60	1	Stopped TMZ	1	0	1	0	1	0	1	0	0	0
Resec	50	63.436	25.2977	1	29.7331	1	1	60	60	1	Yes	1	1	1	1	0	1	1	1	1	1
Resec	80	63.269	29.9959	1	24.2464	1	1	60	60	1	Yes	1	1	1	1	0	1	1	1	1	1
Resec	70	63.091	18.2012	1	2.69405	1	1	60	60	1	Yes	1	1	1	1	0	1	0	0	1	0
Resec	90	62.9213	14.2587	1	4.89528	1	1	60	60	1	Yes	1	1	1	1	0	1	1	1	0	1
Resec	90	62.8392	22.6694	1	3.48255	1	1	60	60	1	Yes	1	1	1	1	0	0	1	0	0	0
Resec	90	62.768	47.6386	1	5.35524	1	1	60	60	1	Stopped TMZ	1	0	1	0	1	0	1	0	1	0
Resec	80	62.7406	14.0287	1	9.95483	1	1	60	60	1	Yes	1	1	1	1	0	0	1	1	0	1
Resec	60	62.6886	0.689938	1	0.525667	1	1	0	0	0	No	0	0	0	0	0	0	0	0	1	0
Resec	100	62.538	10.7105	1	3.02259	1	1	60	60	1	Yes	1	1	1	1	0	0	1	1	0	1
Resec	90	62.1656	17.8727	1	6.07803	1	1	60	60	1	Yes	1	1	1	1	0	0	1	0	1	0
Resec	90	61.9357	11.9589	1	5.68378	1	1	60	60	1	Yes	1	1	1	1	0	1	1	1	0	1
Resec	60	61.9274	1.28131	1	0.657084	1	1	0	0	0	No	0	0	0	0	0	0	0	0	1	0
Resec	100	61.807	29.8645	1			1	60	60	1	Yes	1	1	1	1	0	0	1	0	0	0
Resec	70	61.7522	21.2895	1	7.58932	1	1	60	60	1	Yes	1	1	1	1	0	0	0	0	1	0
Resec	100	61.7029	38.9322	1	13.076	1	1	60	60	1	Yes	1	1	1	1	0	1	1	1	1	1
Resec	70	61.6701	7.0308	1	7.55647	1	1	60	60	1	Yes	1	1	1	1	0	1	1	1	0	1
Resec	80	61.6591	14.8172	0	38.9322	0	1	60	60	1	Yes	1	1	1	1	0	1	1	1	1	1
Resec	90	61.5633	9.03491	1	3.64682	1	1	60	60	1	Yes	1	1	1	1	0	0	1	0	1	0
Resec	100	61.5469	37.5195	1	11.5647	1	1	60	60	1	Yes	1	1	1	1	0	0	1	1	1	1
Resec	80	61.514	35.8439	1	2.92402	1	1	60	60	1	Yes	1	1	1	1	0	0	1	0	0	0
Resec	90	61.5031	67.2526	1	29.7331	1	1	60	60	1	Yes	1	1	1	1	0	0	1	1	0	1
Resec	80	61.3771	3.35113	1	21.2895	1	1	60	60	1	Yes	1	1	1	1	0	1	1	1	1	1
Resec	70	61.2539	9.16632	0	67.2526	0	1	60	60	1	Yes	1	1	1	1	0	0	1	1	1	1
Resec		60.9144	5.25667	1	5.15811	1	1	0	0	0	No	0	0	0	0	0	0	1	0	0	0
Resec	60	60.8953	12.4189	1	1.87269	1	1	60	60	1	Yes	1	1	1	1	0	0	0	0	0	0
Resec	80	60.8734	15.9343	1	3.90965	1	1	60	60	1	Yes	1	1	1	1	0	0	0	0	0	0
Resec	70	60.8159	20.3696	1	10.1848	1	1	60	60	1	Yes	1	1	1	1	0	1	1	1	0	1
Resec		60.7584	102.834	1			1	60	60	1	No	0	0	0	0	0	0	0	0	X	0
Resec	100	60.2628	39.5236	1	9.23203	1	1	60	60	1	Yes	1	1	1	1	0	1	1	1	x	1
Resec	90	60	13.5359	1	17.8398	1	1	60	60	1	Yes	1	1	1	1	0	1	1	0	0	0
Resec	100	59.9535	20.7967	1	33.0185	1	1	60	60	1	Yes	1	1	1	1	0	0	1	1	0	1
Resec	100	59.9507	28.3532	1	12.2546	1	1	60	60	1	Yes	1	1	1	1	0	0	1	1	0	1
Resec		59.4168	4.10678	1	3.38398	1	1	60	60	1	Stopped TMZ	1	0	1	0	1	0	1	0	0	0
Resec	80	59.4059	15.3429	1	3.25257	1	1	60	60	1	Yes	1	1	1	1	0	0	0	0	1	0
Resec	60	59.2608	0.821355	1			1	0	0	0	No	0	0	0	0	0	0	1	0	X	0
Resec	90	59.1567	38.4066	1	11.729	1	1	60	60	1	Yes	1	1	1	1	0	0	1	1	1	1
Resec	70	58.9569	20.6653	1	6.50513	1	1	60	60	1	Yes	1	1	1	1	0	0	1	0	0	0
Resec	90	58.9514	30.9487	0	19.9097	1	1	60	60	1	Yes	1	1	1	1	0	0	1	1	1	1
Resec	70	58.8939	5.78234	1	11.6304	1	1	60	60	1	Yes	1	1	1	1	0	1	1	1	1	1
Resec		58.5325	10.1848	1	46.2587	1	1	48.5	60	0	Stopped TMZ	1	0	1	0	1	0	0	0	X	0
Resec	80	58.3135	9.3963	1	5.05955	1	1	60	60	1	Yes	1	1	1	1	0	0	1	0	0	0
Resec	90	58.3107	8.01643	1	4.89528	1	1	60	60	1	Yes	1	1	1	1	0	0	0	0	0	0
Resec	90	58.2478	12.9117	1	4.36961	1	1	60	60	1	Yes	1	1	1	1	0	1	1	0	0	0
Resec	90	58.1875	6.89938	1	2.59548	1	1	60	60	1	Yes	1	1	1	1	0	0	1	0	0	0
Resec		58.1465	13.2074	1			1	60	60	1	Stopped TMZ	1	0	1	0	1	0	1	0	1	0
Resec	100	57.9165	30.7844	1	6.01232	1	1	60	60	1	Yes	1	1	1	1	0	1	1	1	0	1
Resec	100	57.8535	67.5154	1	3.48255	1	1	60	60	1	Yes	1	1	1	1	0	0	1	0	0	0
Resec	70	57.796	14.2916	1	20.6982	1	1	60	60	1	Yes	1	1	1	1	0	0	1	1	1	1
Resec		57.5332	2.69405	1	2.92402	1	1	50	60	0	Stopped TMZ	1	0	1	0	1	0	0	0	0	0
Resec	90	57.4976	23.6222	1	55.7864	1	1	60	60	1	Yes	1	1	1	1	0	1	1	1	1	1
Resec	70	57.4264	22.5708	1	9.13347	1	1	60	60	1	Yes	1	1	1	1	0	0	1	1	1	1
Resec	90	57.3196	12.5503	1	17.8398	1	1	60	60	1	Yes	1	1	1	1	0	0	1	1	1	1
Resec	70	57.0376	19.9097	1	5.71663	1	1	60	60	1	Yes	1	1	1	1	0	0	1	1	1	1
Resec	80	56.7474	10.4805	1	11.0719	1	1	60	60	1	Yes	1	1	1	1	0	0	1	0	0	0
Resec	70	56.731	18.4312	1	17.347	1	1	60	60	1	Yes	1	1	1	1	0	0	1	1	1	1
Resec	70	56.6762	17.6427	1	7.52361	1	1	60	60	1	Yes	1	1	1	1	0	1	1	0	0	0
Resec	80	56.6242	41.232	1	12.4189	1	1	60	60	1	Yes	1	1	1	1	0	1	1	1	0	1
Resec		56.4244	6.07803	1	2.10267	1	1	58	60	1	Stopped TMZ	1	0	1	0	1	0	1	0	0	0
Resec	90	56.386	19.4497	1	1.87269	1	1	60	60	1	Yes	1	1	1	1	0	1	1	1	0	1
Resec	90	56.3176	10.6119	0	41.232	0	1	60	60	1	Yes	1	1	1	1	0	1	1	1	1	1
Resec	70	56.293	27.7618	1	9.10062	1	1	60	60	1	Yes	1	1	1	1	0	0	1	1	0	1
Resec	90	56.2245	8.73922	1	9.85626	1	1	60	60	1	Yes	1	1	1	1	0	0	1	0	1	0
Resec	90	56.1944	30.7844	1	6.89938	1	1	60	60	1	Yes	1	1	1	1	0	0	1	0	1	0
Resec	70	55.9206	26.8419	1	5.91376	1	1	60	60	1	Yes	1	1	1	1	0	0	1	0	1	0
Resec	90	55.9179	21.5195	1	25.5277	1	1	60	60	1	Yes	1	1	1	1	0	0	1	1	1	1
Resec	80	55.8056	12.9446	1	3.154	1	1	60	60	1	Yes	1	1	1	1	0	1	1	0	1	0
Resec	80	55.7207	12.2218	1	9.3306	1	1	60	60	1	Yes	1	1	1	1	0	0	1	1	0	1
Resec	100	55.6961	25.1992	1	4.13963	1	1	60	60	1	Yes	1	1	1	1	0	1	1	1	0	1
Resec	80	55.666	47.4415	1	8.14784	1	1	60	60	1	Yes	1	1	1	1	0	0	1	0	0	0
Resec	90	55.6468	37.4538	1	3.44969	1	1	60	60	1	Yes	1	1	1	1	0	0	1	1	0	1
Resec	90	55.5948	38.2423	0	37.8809	1	1	60	60	1	Yes	1	1	1	1	0	1	1	1	1	1
Resec	90	55.3457	41.4949	1	28.0246	1	1	60	60	1	Yes	1	1	1	1	0	1	1	1	1	1
Resec	70	55.0116	52.4025	1	28.0575	1	1	60	60	1	Yes	1	1	1	1	0	0	1	1	1	1
Resec	80	54.9733	11.0062	1	28.846	1	1	60	60	1	Yes	1	1	1	1	0	1	1	1	1	1
Resec	80	54.6366	3.94251	1	2.3655	1	1	30	30	1	No	0	0	0	0	0	0	0	0	0	0
Resec	100	54.5654	8.83778	1	42.5133	1	1	60	60	1	Yes	1	1	1	1	0	1	1	1	1	1
Resec	100	54.2533	39.8193	1	9.98768	1	1	60	60	1	Yes	1	1	1	1	0	1	1	1	0	1
Resec		54.1821	25.3634	1	3.58111	1	1	54	60	0	No	0	0	0	0	0	0	1	0	0	0
Resec	90	54.0643	19.4168	1	3.41684	1	1	60	60	1	Yes	1	1	1	1	0	1	1	0	1	0
Resec	80	53.911	13.8645	1	23.3922	1	1	60	60	1	Yes	1	1	1	1	0	1	1	1	1	1
Resec	90	53.6537	20.6324	1	8.54209	1	1	60	60	1	Yes	1	1	1	1	0	0	1	0	1	0
Resec		53.6235	13.2731	1	12.5503	1	1	45	45	1	No	0	0	0	0	0	0	1	0	X	0
Resec		53.6235	4.40246	1	4.27105	1	1	40.5	40.5	1	No	0	0	0	0	0	0	1	0	0	0
Resec	90	53.5222	18.8912	1	5.35524	1	1	60	60	1	Yes	1	1	1	1	0	1	1	0	0	0
Resec	70	53.3196	35.6468	1	7.72074	1	1	60	60	1	Yes	1	1	1	1	0	0	1	1	0	1
Resec	100	53.2868	18.3655	1	5.8809	1	1	60	60	1	Yes	1	1	1	1	0	0	1	0	0	0
Resec	90	52.898	14.3901	1	15.6057	1	1	60	60	1	Yes	1	1	1	1	0	1	1	0	1	0
Resec	90	52.6626	41.232	1	5.38809	1	1	60	60	1	Yes	1	1	1	1	0	0	1	1	0	1
Resec	60	52.4983	7.45791	1	4.6653	1	1	60	60	1	Yes	1	1	1	1	0	0	0	0	0	0
Resec		52.4654	11.0719	1			1	43	60	0	No	0	0	0	0	0	0	0	0	0	0
Resec	90	52.3039	5.61807	1	26.9733	1	1	60	60	1	Yes	1	1	1	1	0	1	1	1	1	1
Resec	100	52.2108	4.89528	1	3.05544	1	1	60	60	1	Yes	1	1	1	1	0	0	1	0	1	0
Resec	90	52.1424	22.4723	1	4.56674	1	1	60	60	1	Yes	1	1	1	1	0	0	0	0	0	0
Resec	90	52.011	38.1766	1	2.03696	1	1	60	60	1	Yes	1	1	1	1	0	0	1	0	1	0
Resec	70	51.666	13.0103	1	12.7146	1	1	60	60	1	Yes	1	1	1	1	0	0	1	0	0	0
Resec	100	51.4825	29.7331	0	28.3203	1	1	60	60	1	Yes	1	1	1	1	0	0	1	1	1	1
Resec	70	50.9569	12.5175	1	9.16632	1	1	60	60	1	Yes	1	1	1	1	0	0	1	0	0	0
Resec	90	50.7789	11.0062	1	2.85832	1	1	60	60	1	Yes	1	1	1	1	0	0	1	1	1	1
Resec	90	50.1711	16.8542	1	8.37782	1	1	60	60	1	Yes	1	1	1	1	0	0	1	1	1	1
Resec	90	50.0424	18.3984	1	9.62628	1	1	60	60	1	Yes	1	1	1	1	0	0	1	0	0	0
Resec	100	49.963	39.1294	1	7.16222	1	1	60	60	1	Yes	1	1	1	1	0	1	1	1	0	1
Resec	90	49.8864	16.1971	1	8.54209	1	1	60	60	1	Yes	1	1	1	1	0	1	1	0	0	0
Resec	80	49.8097	14.9158	0	39.1294	0	1	60	60	1	Yes	1	1	1	1	0	0	1	1	0	1
Resec	80	49.4921	29.0431	1	4.50103	1	1	60	60	1	Yes	1	1	1	1	0	1	1	0	0	0
Resec	90	49.399	16.3614	1	5.65092	1	1	60	60	1	Yes	1	1	1	1	0	1	1	0	0	0
Resec	70	48.961	18.0698	1	5.22382	1	1	60	60	1	Yes	1	1	1	1	0	0	1	0	1	0
Resec		48.5476	39.9507	1			1	60	60	1	Stopped TMZ	1	0	1	0	1	0	1	0	1	0
Resec	90	48.3368	15.8686	1	8.01643	1	1	60	60	1	Yes	1	1	1	1	0	0	1	1	1	1
Resec	70	47.4552	8.24641	1	3.28542	1	1	60	60	1	Yes	1	1	1	1	0	0	1	1	0	1
Resec	100	46.9979	48.8214	1	0.985626	1	1	60	60	1	Yes	1	1	1	1	0	1	0	0	0	0
Resec	90	46.3765	14.0945	1	5.4538	1	1	60	60	1	Yes	1	1	1	1	0	0	1	0	0	0
Resec	80	45.7906	10.3491	0	11.4004	1	1	60	60	1	Yes	1	1	1	1	0	1	1	1	1	1
Resec	90	44.9062	24.2464	1	5.58522	1	1	60	60	1	Yes	1	1	1	1	0	0	1	1	0	1
Resec	80	44.8679	4.36961	1	5.28953	1	1	60	60	1	Yes	1	1	1	1	0	1	0	0	0	0
Resec	100	44.6543	27.6304	1	14.7187	1	1	60	60	1	Yes	1	1	1	1	0	0	1	1	0	1
Resec	x	44.4408	31.8029	1	2.69405	1	1	60	60	1	Yes	1	1	1	1	0	0	0	0	0	0
Resec	90	44.3559	10.7762	1	6.89938	1	1	60	60	1	Yes	1	1	1	1	0	0	1	0	0	0
Resec	90	44.1643	5.0924	1	11.5975	1	1	60	60	1	Yes	1	1	1	1	0	0	1	0	x	0
Resec	70	41.7139	14.6201	1	2.06982	1	1	60	60	1	Yes	1	1	1	1	0	0	0	0	1	0
Resec	90	40.397	12.5175	1	2.52977	1	1	60	60	1	Yes	1	1	1	1	0	1	1	0	0	0
Resec	100	39.7016	17.8398	1	10.2505	1	1	60	60	1	Yes	1	1	1	1	0	0	1	1	0	1
Resec		38.8884	13.0103	1			1	0	0	0	No	0	0	0	0	0	0	0	0	0	0
Resec	70	38.883	24.115	1	11.2033	1	1	60	60	1	Yes	1	1	1	1	0	0	1	0	0	0
Resec	90	38.1848	36.7967	1	14.4887	1	1	60	60	1	Yes	1	1	1	1	0	1	1	1	0	1
Resec	60	34.5298	21.2567	1	8.93634	1	1	60	60	1	Yes	1	1	1	1	0	0	1	0	0	0
Resec	100	30.4668	15.2772	1	15.4743	1	1	60	60	1	Yes	1	1	1	1	0	0	1	1	1	1
Resec	90	30.2916	36.5996	1	19.7782	1	1	60	60	1	Yes	1	1	1	1	0	0	1	1	1	1

## Sheet: All 173 resec-crt
Resec/Biopsy	KPS	KPS<70	Age	OS	Status	Maximal Resec	Gy	CRT	Boosted?	Start Adj-TMZ	Stupp≥6-cycles	MGMT	CRT with focus?	First	Second	Where Boost	Total	Plan Gy
Resec	100	0	79.2498	24.4435	1	1	60	1	0	1	1	0	0	30x2 Gy			60	60
Resec	100	0	77.9986	60.9117	1	1	60	1	1	1	1	1	1	25x2 Gy	5x2 Gy	Not specified	60	60
Resec	90	0	77.9576	14.883	1	1	60	1	0	1	1	0	0	30x2 Gy			60	60
Resec	80	0	76.7502	18.4641	1	1	60	1	0	1	1	1	0	30x2 Gy			60	60
Resec	90	0	76.386	15.2444	1	1	60	1	0	1	1	0	0	30x2 Gy			60	60
Resec	100	0	76.0575	12.616	1	1	60	1	0	1	1	1	0	30x2 Gy			60	60
Resec	90	0	75.0828	27.4004	1	1	60	1	1	1	1	0	1	23x2 Gy	7x2 Gy	Tumor Bed	60	60
Resec	80	0	75.0198	21.6509	1	1	60	1	0	0	0	0	0	30x2 Gy			60	60
Resec	80	0	74.5544	16	1	1	60	1	0	0	0	1	0	30x2 Gy			60	60
Resec	90	0	74.3628	17.4784	1	1	60	1	1	0	0	0	1	23x2 Gy	7x2 Gy	Tumor Bed	60	60
Resec	60	1	73.7084	6.17659	1	1	60	1	0	0	0	0	0	30x2 Gy			60	60
Resec	80	0	73.5441	8.67351	1	1	60	1	0	1	1	x	0	30x2 Gy			60	60
Resec	90	0	72.6762	9.46201	1	1	60	1	1	1	0	0	1	25x2 Gy	5x2 Gy	Tumor Bed	60	60
Resec	80	0	72.5284	7.68789	1	1	60	1	1	1	0	0	1	25x2 Gy	5x2 Gy	Tumor Bed	60	60
Resec	90	0	72.4216	15.5729	1	1	60	1	0	1	1	0	0	30x2 Gy			60	60
Resec	100	0	71.1814	40.6735	1	1	60	1	1	1	1	0	1	25x2 Gy	5x2 Gy	Tumor Bed	60	60
Resec	90	0	71.1431	19.1869	1	1	60	1	0	1	0	x	0	30x2 Gy			60	60
Resec	90	0	70.8337	28.8789	1	1	60	1	0	1	1	1	0	30x2 Gy			60	60
Resec	100	0	70.705	24.5421	1	1	60	1	0	1	1	0	0	30x2 Gy			60	60
Resec	90	0	70.6667	27.6632	1	1	60	1	0	1	1	0	0	30x2 Gy			60	60
Resec	80	0	70.4887	6.6037	1	1	60	1	0	0	0	0	0	30x2 Gy			60	60
Resec	80	0	70.2505	15.5072	1	1	60	1	0	1	0	0	0	30x2 Gy			60	60
Resec	90	0	70.1355	40.3778	1	1	60	1	1	1	1	1	1	23x2 Gy	7x2 Gy	tumor bed boost	60	60
Resec	90	0	70.1136	14.6201	1	1	60	1	0	1	1	0	0	30x2 Gy			60	60
Resec	70	0	69.8645	13.2731	1	1	60	1	1	1	0	1	1	23x2 Gy	7x2 Gy	Tumor Bed	60	60
Resec	100	0	69.7823	38.5051	1	1	60	1	0	1	1	1	0	30x2 Gy			60	60
Resec	80	0	69.744	17.5113	1	1	60	1	0	1	1	0	0	30x2 Gy			60	60
Resec	70	0	69.5606	39.7207	1	1	60	1	0	1	0	0	0	30x2 Gy			60	60
Resec	100	0	69.0623	12.0246	1	1	60	1	0	1	0	1	0	30x2 Gy			60	60
Resec	90	0	68.4052	28.4517	1	1	60	1	0	1	1	0	0	30x2 Gy			60	60
Resec	80	0	68.2765	12.386	1	1	60	1	0	1	1	1	0	30x2 Gy			60	60
Resec	70	0	68.2327	24.0493	1	1	60	1	0	1	0	1	0	30x2 Gy			60	60
Resec	80	0	68.1068	21.3881	1	1	60	1	0	1	1	0	0	30x2 Gy			60	60
Resec	90	0	67.6496	17.0185	1	1	60	1	0	1	1	1	0	30x2 Gy			60	60
Resec	80	0	67.5811	15.9014	1	1	60	1	0	1	0	1	0	30x2 Gy			60	60
Resec	80	0	67.2361	9.72485	1	1	60	1	0	1	0	0	0	30x2 Gy			60	60
Resec	90	0	67.0308	9.72485	1	1	60	1	0	1	0	1	0	30x2 Gy			60	60
Resec	80	0	66.9405	40.6407	1	1	60	1	1	1	1	1	1	25x2 Gy	5x2 Gy	Tumor Bed	60	60
Resec	90	0	66.8939	25.1006	1	1	60	1	1	1	1	0	1	23x2 Gy	7x2 Gy	Tumor Bed	60	60
Resec	90	0	66.7762	22.308	1	1	60	1	1	1	0	0	1	25x2 Gy	5x2 Gy	Tumor Bed	60	60
Resec	70	0	66.6968	9.88912	1	1	60	1	0	1	1	1	0	30x2 Gy			60	60
Resec	100	0	66.5654	27.6632	1	1	60	1	1	1	1	1	1	23x2 Gy	7x2 Gy	Tumor Bed	60	60
Resec	100	0	66.5435	54.9651	0	1	60	1	0	1	1	1	0	30x2 Gy			60	60
Resec	60	1	66.3326	35.8768	1	1	60	1	1	1	1	1	1	25x2 Gy	5x2 Gy	Tumor Bed	60	60
Resec	70	0	65.8535	23.2936	1	1	60	1	1	1	1	1	1	25x2 Gy	5x2 Gy	Tumor Bed	60	60
Resec	90	0	65.8042	42.1191	1	1	60	1	1	1	1	1	1	14x2 Gy	16x2 gy	Complex plan adaptive frontal NOT PTVwbrt	60	60
Resec	80	0	65.7194	8.54209	1	1	60	1	0	0	0	0	0	30x2 Gy			60	60
Resec	80	0	65.6537	25.5606	1	1	60	1	0	1	0	1	0	30x2 Gy			60	60
Resec	90	0	65.5469	17.117	1	1	60	1	0	1	1	0	0	30x2 Gy			60	60
Resec	70	0	65.4648	17.7413	1	1	60	1	0	1	0	0	0	30x2 Gy			60	60
Resec	90	0	65.1581	10.2177	1	1	60	1	1	1	0	0	1	25x2 Gy	5x2 Gy	Tumor Bed	60	60
Resec	90	0	65.1116	8.90349	1	1	60	1	0	0	0	0	0	30x2 Gy			60	60
Resec	100	0	64.5585	16.23	1	1	60	1	1	1	1	0	1	23x2 Gy	7x2 Gy	Tumor Bed	60	60
Resec	70	0	64.4682	15.54	1	1	60	1	0	1	1	1	0	30x2 Gy			60	60
Resec	80	0	64.4408	38.7023	1	1	60	1	0	1	1	1	0	30x2 Gy			60	60
Resec	60	1	64.3669	13.5688	1	1	60	1	0	1	0	0	0	30x2 Gy			60	60
Resec	100	0	64.2656	15.4415	1	1	60	1	0	1	0	0	0	30x2 Gy			60	60
Resec	80	0	64.2272	23.9179	1	1	60	1	0	1	1	1	0	30x2 Gy			60	60
Resec	80	0	64.0137	30.193	1	1	60	1	0	1	1	0	0	30x2 Gy			60	60
Resec	100	0	63.948	45.1088	1	1	60	1	1	1	1	1	1	23x2 Gy	7x2 Gy	Not specified	60	60
Resec	80	0	63.8631	28.9774	1	1	60	1	0	1	1	0	0	30x2 Gy			60	60
Resec	90	0	63.8275	27.4661	1	1	60	1	1	1	1	0	1	23x2 Gy	7x2 Gy	Tumor Bed	60	60
Resec	80	0	63.8248	38.8337	1	1	60	1	1	1	1	1	1	25x2 Gy	5x2 Gy	Tumor Bed	60	60
Resec	100	0	63.729	31.3429	1	1	60	1	1	1	1	1	1	25x2 Gy	5x2 Gy	Tumor Bed	60	60
Resec	50	1	63.436	25.2977	1	1	60	1	1	0	0	1	1	(9+16)x2 Gy	5x2 Gy	Tumor Bed	60	60
Resec	80	0	63.269	29.9959	1	1	60	1	1	1	1	0	1	23x2 Gy	7x2 Gy	Tumor Bed	60	60
Resec	70	0	63.091	18.2012	1	1	60	1	0	1	0	0	0	30x2 Gy			60	60
Resec	90	0	62.9213	14.2587	1	1	60	1	0	1	1	0	0	30x2 Gy			60	60
Resec	90	0	62.8392	22.6694	1	1	60	1	0	1	1	0	0	30x2 Gy			60	60
Resec	80	0	62.7406	14.0287	1	1	60	1	0	1	0	1	0	30x2 Gy			60	60
Resec	100	0	62.538	10.7105	1	1	60	1	1	1	0	0	1	25x2 Gy	5x2 Gy	Tumor Bed	60	60
Resec	90	0	62.1656	17.8727	1	1	60	1	1	1	1	0	1	23x2 Gy	7x2 Gy	Tumor Bed	60	60
Resec	90	0	61.9357	11.9589	1	1	60	1	0	0	0	1	0	30x2 Gy			60	60
Resec	100	0	61.807	29.8645	1	1	60	1	1	1	1	1	1	23x2 Gy	7x2 Gy	Not specified	60	60
Resec	70	0	61.7522	21.2895	1	1	60	1	1	1	1	0	1	25x2 Gy	5x2 Gy	Tumor Bed	60	60
Resec	100	0	61.7029	38.9322	0	1	60	1	1	1	1	1	1	23x2 Gy	7x2 Gy	Tumor Bed	60	60
Resec	70	0	61.6701	7.0308	1	1	60	1	0	1	0	1	0	30x2 Gy			60	60
Resec	80	0	61.6591	14.8172	1	1	60	1	0	1	1	1	0	30x2 Gy			60	60
Resec	90	0	61.5633	9.03491	1	1	60	1	0	1	0	0	0	30x2 Gy			60	60
Resec	100	0	61.5469	37.5195	1	1	60	1	0	1	1	0	0	30x2 Gy			60	60
Resec	80	0	61.514	35.8439	1	1	60	1	1	1	1	1	1	23x2 Gy	7x2 Gy	Not specified	60	60
Resec	90	0	61.5031	67.2526	0	1	60	1	0	1	1	1	0	30x2 Gy			60	60
Resec	80	0	61.3771	3.35113	1	1	60	1	0	0	0	0	0	30x2 Gy			60	60
Resec	70	0	61.2539	9.16632	1	1	60	1	0	0	0	0	0	30x2 Gy			60	60
Resec	60	1	60.8953	12.4189	1	1	60	1	1	1	1	0	1	25x2 Gy	5x2 Gy	Tumor Bed	60	60
Resec	80	0	60.8734	15.9343	1	1	60	1	1	1	1	x	1	23x2 Gy	7x2 Gy	Tumor Bed	60	60
Resec	70	0	60.8159	20.3696	1	1	60	1	1	1	0	0	1	25x2 Gy	5x2 Gy	Tumor Bed	60	60
Resec	100	0	60.2628	39.5236	1	1	60	1	0	1	1	0	0	30x2 Gy			60	60
Resec	90	0	60	13.5359	1	1	60	1	0	1	1	0	0	30x2 Gy			60	60
Resec	100	0	59.9535	20.7967	1	1	60	1	0	0	0	1	0	30x2 Gy			60	60
Resec	100	0	59.9507	28.3532	1	1	60	1	0	1	1	1	0	30x2 Gy			60	60
Resec	80	0	59.4059	15.3429	1	1	60	1	0	1	0	0	0	30x2 Gy			60	60
Resec	90	0	59.1567	38.4066	0	1	60	1	0	1	1	1	0	30x2 Gy			60	60
Resec	70	0	58.9569	20.6653	1	1	60	1	1	1	1	1	1	23x2 Gy	7x2 Gy	Tumor Bed	60	60
Resec	90	0	58.9514	30.9487	1	1	60	1	0	1	0	0	0	30x2 Gy			60	60
Resec	70	0	58.8939	5.78234	1	1	60	1	0	0	0	0	0	30x2 Gy			60	60
Resec	80	0	58.3135	9.3963	1	1	60	1	1	1	0	0	1	25x2 Gy	5x2 Gy	residual tumor	60	60
Resec	90	0	58.3107	8.01643	1	1	60	1	0	1	0	0	0	30x2 Gy			60	60
Resec	90	0	58.2478	12.9117	1	1	60	1	1	1	1	0	1	25x2 Gy	5x2 Gy	Tumor Bed	60	60
Resec	90	0	58.1875	6.89938	1	1	60	1	0	1	0	0	0	30x2 Gy			60	60
Resec	100	0	57.9165	30.7844	1	1	60	1	0	1	1	1	0	30x2 Gy			60	60
Resec	100	0	57.8535	67.5154	1	1	60	1	1	1	1	1	1	25x2 Gy	5x2 Gy	Tumor Bed	60	60
Resec	70	0	57.796	14.2916	1	1	60	1	0	1	1	1	0	30x2 Gy			60	60
Resec	90	0	57.4976	23.6222	1	1	60	1	0	1	1	1	0	30x2 Gy			60	60
Resec	70	0	57.4264	22.5708	1	1	60	1	0	1	1	1	0	30x2 Gy			60	60
Resec	90	0	57.3196	12.5503	1	1	60	1	0	1	0	0	0	30x2 Gy			60	60
Resec	70	0	57.0376	19.9097	1	1	60	1	0	1	1	1	0	30x2 Gy			60	60
Resec	80	0	56.7474	10.4805	1	1	60	1	1	1	0	0	1	23x2 Gy	7x2 Gy	Tumor Bed	60	60
Resec	70	0	56.731	18.4312	1	1	60	1	1	1	1	0	1	23x2 Gy	7x2 Gy	Tumor Bed	60	60
Resec	70	0	56.6762	17.6427	1	1	60	1	1	1	1	0	1	25x2 Gy	5x2 Gy	Tumor Bed	60	60
Resec	80	0	56.6242	41.232	0	1	60	1	1	1	1	1	1	23x2 Gy	7x2 Gy	Not specified	60	60
Resec	90	0	56.386	19.4497	1	1	60	1	0	1	1	0	0	30x2 Gy			60	60
Resec	90	0	56.3176	10.6119	1	1	60	1	0	1	0	1	0	30x2 Gy			60	60
Resec	70	0	56.293	27.7618	1	1	60	1	0	1	0	1	0	30x2 Gy			60	60
Resec	90	0	56.2245	8.73922	1	1	60	1	0	1	0	1	0	30x2 Gy			60	60
Resec	90	0	56.1944	30.7844	1	1	60	1	0	1	1	1	0	30x2 Gy			60	60
Resec	70	0	55.9206	26.8419	1	1	60	1	1	1	0	1	1	25x2 Gy	5x2 Gy	Tumor Bed	60	60
Resec	90	0	55.9179	21.5195	1	1	60	1	0	1	1	0	0	30x2 Gy			60	60
Resec	80	0	55.8056	12.9446	1	1	60	1	1	1	1	0	1	23x2 Gy	7x2 Gy	Tumor Bed	60	60
Resec	80	0	55.7207	12.2218	1	1	60	1	0	1	0	0	0	30x2 Gy			60	60
Resec	100	0	55.6961	25.1992	1	1	60	1	0	1	1	0	0	30x2 Gy			60	60
Resec	80	0	55.666	47.4415	0	1	60	1	1	1	1	1	1	23x2 Gy	7x2 Gy	Not specified	60	60
Resec	90	0	55.6468	37.4538	1	1	60	1	1	1	1	1	1	25x2 Gy	5x2 Gy	Tumor Bed	60	60
Resec	90	0	55.5948	38.2423	1	1	60	1	0	1	1	1	0	30x2 Gy			60	60
Resec	90	0	55.3457	41.4949	1	1	60	1	1	1	1	1	1	25x2 Gy	5x2 Gy	Tumor Bed	60	60
Resec	70	0	55.0116	52.4025	1	1	60	1	1	1	1	1	1	23x2 Gy	7x2 Gy	Where planned	60	60
Resec	80	0	54.9733	11.0062	1	1	60	1	1	1	1	0	1	23x2 Gy	7x2 Gy	Tumor Bed	60	60
Resec	100	0	54.5654	8.83778	1	1	60	1	1	1	0	1	1	(22+3)x2 Gy	5x2 Gy	Tumor Bed	60	60
Resec	100	0	54.2533	39.8193	1	1	60	1	1	1	1	1	1	23x2 Gy	7x2 Gy	Tumor Bed	60	60
Resec	90	0	54.0643	19.4168	1	1	60	1	0	1	0	1	0	30x2 Gy			60	60
Resec	80	0	53.911	13.8645	1	1	60	1	1	1	0	0	1	23x2 Gy	7x2 Gy	Tumor Bed	60	60
Resec	90	0	53.6537	20.6324	1	1	60	1	0	1	1	0	0	30x2 Gy			60	60
Resec	90	0	53.5222	18.8912	1	1	60	1	0	1	0	0	0	30x2 Gy			60	60
Resec	70	0	53.3196	35.6468	1	1	60	1	1	1	0	1	1	22x2 Gy	8x2 Gy	Tumor Bed (rim on MRI)	60	60
Resec	100	0	53.2868	18.3655	1	1	60	1	0	1	1	0	0	30x2 Gy			60	60
Resec	90	0	52.898	14.3901	1	1	60	1	0	0	0	0	0	30x2 Gy			60	60
Resec	90	0	52.6626	41.232	1	1	60	1	1	1	1	1	1	24x2 Gy	6x2 gy	parietal PTVboost	60	60
Resec	60	1	52.4983	7.45791	1	1	60	1	0	1	0	1	0	30x2 Gy			60	60
Resec	90	0	52.3039	5.61807	1	1	60	1	0	0	0	0	0	30x2 Gy			60	60
Resec	100	0	52.2108	4.89528	1	1	60	1	0	1	0	1	0	30x2 Gy			60	60
Resec	90	0	52.1424	22.4723	1	1	60	1	0	1	0	0	0	30x2 Gy			60	60
Resec	90	0	52.011	38.1766	0	1	60	1	0	1	1	1	0	30x2 Gy			60	60
Resec	70	0	51.666	13.0103	1	1	60	1	0	1	0	0	0	30x2 Gy			60	60
Resec	100	0	51.4825	29.7331	1	1	60	1	0	1	1	1	0	30x2 Gy			60	60
Resec	70	0	50.9569	12.5175	1	1	60	1	0	1	1	1	0	30x2 Gy			60	60
Resec	90	0	50.7789	11.0062	1	1	60	1	0	1	0	0	0	30x2 Gy			60	60
Resec	90	0	50.1711	16.8542	1	1	60	1	1	1	1	0	1	25x2 Gy	5x2 Gy	Tumor Bed	60	60
Resec	90	0	50.0424	18.3984	1	1	60	1	1	1	0	0	1	25x2 Gy	5x2 Gy	Tumor Bed	60	60
Resec	100	0	49.963	39.1294	0	1	60	1	0	1	1	0	0	30x2 Gy			60	60
Resec	90	0	49.8864	16.1971	1	1	60	1	1	1	0	0	1	23x2 Gy	7x2 Gy	Tumor Bed	60	60
Resec	80	0	49.8097	14.9158	1	1	60	1	1	1	0	0	1	23x2 Gy	7x2 Gy	Tumor Bed	60	60
Resec	80	0	49.4921	29.0431	1	1	60	1	0	1	0	1	0	30x2 Gy			60	60
Resec	90	0	49.399	16.3614	1	1	60	1	0	1	1	1	0	30x2 Gy			60	60
Resec	70	0	48.961	18.0698	1	1	60	1	0	1	1	0	0	30x2 Gy			60	60
Resec	90	0	48.3368	15.8686	1	1	60	1	1	0	0	0	1	23x2 Gy	7x2 Gy	Tumor Bed	60	60
Resec	70	0	47.4552	8.24641	1	1	60	1	0	1	0	0	0	30x2 Gy			60	60
Resec	100	0	46.9979	48.8214	0	1	60	1	1	1	1	1	1	23x2 Gy	7x2 Gy	Tumor Bed	60	60
Resec	90	0	46.3765	14.0945	1	1	60	1	0	1	1	0	0	30x2 Gy			60	60
Resec	80	0	45.7906	10.3491	1	1	60	1	1	0	0	0	1	25x2 Gy	5x2 Gy	Tumor Bed	60	60
Resec	90	0	44.9062	24.2464	1	1	60	1	0	1	1	0	0	30x2 Gy			60	60
Resec	80	0	44.8679	4.36961	1	1	60	1	0	0	0	0	0	30x2 Gy			60	60
Resec	100	0	44.6543	27.6304	1	1	60	1	0	1	0	0	0	30x2 Gy			60	60
Resec		0	44.4408	31.8029	1	1	60	1	0	1	0	x	0	30x2 Gy			60	60
Resec	90	0	44.3559	10.7762	1	1	60	1	0	0	0	1	0	30x2 Gy			60	60
Resec	90	0	44.1643	5.0924	1	1	60	1	1	1	0	0	1	25x2 Gy	5x2 Gy	Tumor Bed	60	60
Resec	70	0	41.7139	14.6201	1	1	60	1	0	1	1	0	0	30x2 Gy			60	60
Resec	90	0	40.397	12.5175	1	1	60	1	0	1	0	0	0	30x2 Gy			60	60
Resec	100	0	39.7016	17.8398	1	1	60	1	1	1	1	0	1	23x2 Gy	7x2 Gy	Tumor Bed	60	60
Resec	70	0	38.883	24.115	1	1	60	1	0	1	0	0	0	30x2 Gy			60	60
Resec	90	0	38.1848	36.7967	1	1	60	1	0	1	1	1	0	30x2 Gy			60	60
Resec	60	1	34.5298	21.2567	1	1	60	1	0	1	1	1	0	30x2 Gy			60	60
Resec	100	0	30.4668	15.2772	1	1	60	1	0	1	1	1	0	30x2 Gy			60	60
Resec	90	0	30.2916	36.5996	1	1	60	1	0	1	1	1	0	30x2 Gy			60	60

## Sheet: SoC 173 Pt
Sex	Ethnicity	wealth	BMI	BSA m2	KPS	MGMT-Meth	Age	OS	Status (OS)	PFS	Status (PFS)	Maximal Resection	Surg-CRT (Days)	CRT	Brain-Boost CRT	End-CRT mg/m2 Dex	<1.2 mg/m2 End-CRT	Adj-CRT Days	Optimal gap	TMZ Dex mg/m2	TMZ Dex <1.2mgm2	Start Adj-TMZ	Num TMZ cycles	Stupp≥6-cycles	End-Stage Dex mg/m2	pre-pall Dex-free	Ignore Progression
M	White	65738	24.208	1.77998	100	1	77.9986	60.9117	1	56.3778	1	1	27	1	1	0.561803	1	194	1	0	1	1	2	1	0	1	0
M	Asian	142073	36.9006	2.09849	80	1	76.7502	18.4641	1	16.5585	1	1	28	1	0	0	1	65	0	0	1	1	6	1	3.81226	0	0
F	White	196233	20.3089	1.41316	100	1	76.0575	12.616	1	9.65914	1	1	21	1	0	2.83054	0	70	0	2.83054	0	1	0	1	2.83054	0	0
F	White	92026	22.2963	1.66958	80	1	74.5544	16	1	12.6817	1	1	51	1	0	0	1					0	4	0	4.79162	0	0
M	White	99471	24.6486	2.13238	90	1	70.8337	28.8789	1	24.1807	1	1	28	1	0	0	1	77	1	0	1	1	6	1	0	1	0
F	Black	85787	24.7972	1.68009	90	1	70.1355	40.3778	1	24.6407	1	1	48	1	1	1.19041	1	81	1	0	1	1	6	1	7.14247	0	0
F	White	64277	23.4089	1.59367	70	1	69.8645	13.2731	1	6.73511	1	1	55	1	1	0	1	98	1	5.01985	0	1	6	0	1.25496	0	0
F	White	44745	29.4441	1.78734	100	1	69.7823	38.5051	1	23.9836	1	1	35	1	0	2.23796	0	105	1	1.11898	1	1	15	1	3.35694	0	0
F	White	91375	17.9225	1.39446	100	1	69.0623	12.0246	1	6.6037	1	1	28	1	0	x		70	0	2.86849	0	1	12	0	2.86849	0	0
M	Black	142073	35.8673	2.36656	80	1	68.2765	12.386	1	11.6632	1	1	22	1	0	3.38044	0	42	0	1.69022	0	1	6	1	7.60598	0	0
F	White	77171	20.7988	1.61254	70	1	68.2327	24.0493	1	11.9918	1	1	23	1	0	0	1	166	1	0	1	1	12	0	2.48056	0	0
F	Black	53406	27.5712	2.2097	90	1	67.6496	17.0185	1	3.41684	1	1	29	1	0	0	1	72	0	1.8102	0	1	6	1	1.8102	0	1
M	White	87669	18.548	1.62942	80	1	67.5811	15.9014	1	6.30801	1	1	47	1	0	1.22743	0	115	1	2.45486	0	1	5	0	2.45486	0	0
F	White	105799	33.9829	2.01382	90	1	67.0308	9.72485	1	8.31211	1	1	35	1	0	0	1	66	0	1.98627	0	1	6	0	8.93823	0	0
M	White	105799	24.3919	2.12125	80	1	66.9405	40.6407	1	23.5565	1	1	20	1	1	0	1	98	1	0	1	1	7	1	1.88568	0	0
M	White	144391	26.7151	2.13058	70	1	66.6968	9.88912	1	8.6078	1	1	25	1	0	1.87742	0	70	0	1.87742	0	1	1	1	1.87742	0	0
F	Asian	111111	25.5814	1.58602	100	1	66.5654	27.6632	1	8.70637	1	1	61	1	1	2.52203	0	71	0			1	3	1	0	1	0
M	Hispanic-White		23.5651	1.83662	100	1	66.5435	54.9651	0	38.2094	1	1	42	1	0	0.27224	1	89	1	0	1	1	6	1	2.17792	0	0
M	White	75502	45.1092	2.1061	60	1	66.3326	35.8768	1	30.3573	1	1	39	1	1	0	1	70	0	0	1	1	0	1	0	1	0
F	White	72054	18.548	1.62942	70	1	65.8535	23.2936	1	14.0616	1	1	14	1	1	3.68229	0	42	0	2.45486	0	1	6	1	3.68229	0	0
F	White	210577	32.6125	2.01922	90	1	65.8042	42.1191	1	36.271	1	1	24	1	1	0	1	65	0	0.990483	1	1	7	1	0	1	0
F	White	66529	29.6175	1.92427	80	1	65.6537	25.5606	1	1.51129	1	1	54	1	0	0	1	74	0	2.07872	0	1	6	0	2.59839	0	0
M	White	70436	24.4051	2.07896	70	1	64.4682	15.54	1	8.24641	1	1	28	1	0	0	1	81	1	0	1	1	6	1	3.84808	0	0
M	White	122979	26.0784	2.06133	80	1	64.4408	38.7023	1	14.5216	1	1	32	1	0	0	1	68	0	0	1	1	0	1	0	1	0
F	White	95698	28.9	1.923	80	1	64.2272	23.9179	1	17.9384	1	1	28	1	0	1.04004	1	77	1	0	1	1	12	1	4.16017	0	0
Male	Hispanic-White	105799	21.2335	1.82087	100	1	63.948	45.1088	1	32.1314	1	1	32	1	1	0	1	77	1	0	1	1	18	1	0	1	0
Male	White	86783	25.681	2.00251	80	1	63.8248	38.8337	1	29.7331	1	1	49	1	1	0	1	77	1	0	1	1	6	1	1.9975	0	0
M	White	94870	27.0546	2.09956	100	1	63.729	31.3429	1	24.2464	1	1	27	1	1	0.238145	1	82	1	0.95258	1	1	0	1	0	1	0
M	White	71089	32.5463	2.35164	50	1	63.436	25.2977	1	2.69405	1	1	27	1	1	2.12618	0					0	12	0	0.850472	0	0
M	Black	81736	38.3851	2.66103	80	1	62.7406	14.0287	1	6.07803	1	1	31	1	0	0.751589	1	72	0	1.50318	0	1	3	0	3.00635	0	0
M	White	88670	27.5712	2.2097	90	1	61.9357	11.9589	1	7.58932	1	1	31	1	0	0.905101	1			x		0	1	0	0	1	0
F	White	39310	28.8862	2.03343	100	1	61.807	29.8645	1	13.076	1	1	35	1	1	0	1	79	1	0	1	1	3	1	0.983559	0	0
M	White	128878	26.2897	1.81294	100	1	61.7029	38.9322	0	38.9322	0	1	32	1	1	0.55159	1	77	1	0.55159	1	1	0	1	0	1	0
F	White	112815	27.4544	1.85267	70	1	61.6701	7.0308	1	3.64682	1	1	34	1	0	2.15905	0	71	0	3.23858	0	1	1	0	3.23858	0	0
F	White	142073	28.4301	2.01731	80	1	61.6591	14.8172	1	11.5647	1	1	28	1	0	0.991417	1	72	0	1.98283	0	1	6	1	2.97425	0	0
M	White	60477	22.0448	1.77638	80	1	61.514	35.8439	1	21.2895	1	1	34	1	1	2.25177	0	361	1	0	1	1	6	1	6.7553	0	0
F	White	111290	43.3796	2.43711	90	1	61.5031	67.2526	0	67.2526	0	1	34	1	0	0	1	84	1	0	1	1	3	1	0	1	0
M	White	111290	29.9697	2.25663	100	1	59.9535	20.7967	1	3.25257	1	1	23	1	0	1.77255	0			x		0	9	0	1.77255	0	0
F	White	111290	30.9503	1.93505	100	1	59.9507	28.3532	1	11.729	1	1	66	1	0	0	1	71	0	0	1	1	12	1	2.06713	0	0
F	Hispanic-White	48080	39.0481	1.8184	90	1	59.1567	38.4066	0	19.9097	1	1	25	1	0	0	1	70	0	0	1	1	5	1	0	1	0
M	White	69857	34.6622	2.52869	70	1	58.9569	20.6653	1	11.6304	1	1	37	1	1	0.395461	1	68	0	1.58185	0	1	6	1	3.16369	0	0
M	White	111537	20.477	1.86532	100	1	57.9165	30.7844	1	20.6982	1	1	15	1	0	2.14441	0	125	1	0	1	1	6	1	0	1	0
F	White	168078	27.6121	2.03209	100	1	57.8535	67.5154	1	55.7864	1	1	38	1	1	0	1	84	1	0	1	1	5	1	0	1	0
M	Black	142073	29.7042	2.19997	70	1	57.796	14.2916	1	9.13347	1	1	19	1	0	1.8182	0	91	1	1.8182	0	1	0	1	7.27282	0	1
M	White	70533	38.4721	2.47729	90	1	57.4976	23.6222	1	17.8398	1	1	23	1	0	1.61467	0	75	1	0	1	1	6	1	0.807333	0	0
M	White	102333	26.5418	2.03579	70	1	57.4264	22.5708	1	5.71663	1	1	30	1	0	1.96484	0	70	0	1.96484	0	1	2	1	0	1	1
M	arab		17.4321	1.68532	70	1	57.0376	19.9097	1	17.347	1	1	16	1	0	x		74	0	2.37344	0	1	3	1	1.18672	0	0
M	White	73142	30.7129	2.14316	80	1	56.6242	41.232	0	41.232	0	1	69	1	1	0.466601	1	50	0	1.3998	0	1	6	1	0	1	0
M	White	65620	24.9956	2.19101	90	1	56.3176	10.6119	1	9.85626	1	1	31	1	0	0.912822	1	74	0	0.912822	1	1	12	0	2.73847	0	0
M	White	47453	23.8784	2.0988	70	1	56.293	27.7618	1	6.89938	1	1	21	1	0	x		68	0			1	6	0	0	1	0
Male	White	120819	31.1644	2.06568	90	1	56.2245	8.73922	1	5.91376	1	1	42	1	0	1.93641	0	70	0	3.87282	0	1	6	0	3.87282	0	0
F	Hispanic-White	68587	24.2144	1.54307	90	1	56.1944	30.7844	1	25.5277	1	1	37	1	0	0.64806	1	102	1	0	1	1	3	1	5.18448	0	0
M	White	98610	30.4176	2.13283	70	1	55.9206	26.8419	1	3.154	1	1	57	1	1	3.75088	0	42	0	5.62632	0	1	2	0	3.75088	0	0
M	White	108301	25.9882	2.14532	80	1	55.666	47.4415	0	37.8809	1	1	14	1	1	0	1	67	0	0	1	1	6	1	0.93226	0	0
F	White	105799	32.0044	1.86343	90	1	55.6468	37.4538	1	28.0246	1	1	47	1	1	0.536645	1	98	1	0	1	1	6	1	1.07329	0	0
F	Hispanic-White		28.404	1.92809	90	1	55.5948	38.2423	1	28.0575	1	1	39	1	0	1.0373	1	112	1	1.0373	1	1	6	1	0	1	0
M	Black	108958	23.7455	2.05067	90	1	55.3457	41.4949	1	28.846	1	1	46	1	1	1.95058	0	100	1	0.975291	1	1	2	1	0	1	0
M	Hispanic-White	149849	29.2859	2.18442	70	1	55.0116	52.4025	1	42.5133	1	1	24	1	1	0.915573	1	98	1	0	1	1	5	1	0.915573	0	0
M	White	44572	28.478	2.19975	100	1	54.5654	8.83778	1	3.41684	1	1	22	1	1	0.909192	1	67	0	0.909192	1	1	3	0	0.909192	0	0
F	Hispanic-White	55961	35.6621	1.96703	100	1	54.2533	39.8193	1	23.3922	1	1	32	1	1	0	1	69	0	0	1	1	4	1	4.06704	0	0
M	Hispanic-White	53398	30.4176	2.13283	90	1	54.0643	19.4168	1	8.54209	1	1	69	1	0	0	1	67	0	0	1	1	6	0	3.75088	0	0
M	White	95376	26.7325	2.06502	70	1	53.3196	35.6468	1	15.6057	1	1	44	1	1	0.968515	1	91	1	0.968515	1	1	2	0	0.242129	0	0
F	White	111290	23.804	1.80533	90	1	52.6626	41.232	1	26.9733	1	1	22	1	1	1.10783	1	106	1	0	1	1	2	1	0	1	0
M	White	72004	27.6124	2.12109	60	1	52.4983	7.45791	1	3.05544	1	1	48	1	0	1.88582	0	38	0	3.77164	0	1	12	0	3.77164	0	0
Female	White	61573	39.3035	2.16574	100	1	52.2108	4.89528	1	2.03696	1	1	20	1	0	1.84694	0	70	0	1.84694	0	1	6	0	0	1	0
F	Asian	53406	33.2781	2.03972	90	1	52.011	38.1766	0	28.3203	1	1	35	1	0	1.96106	0	70	0	0	1	1	7	1	0.980528	0	0
Female	White	42279	20.8031	1.80232	100	1	51.4825	29.7331	1	2.85832	1	1	27	1	0	0	1	77	1	0	1	1	6	1	0	1	1
M	White	80051	34.038	2.40492	70	1	50.9569	12.5175	1	8.37782	1	1	8	1	0	1.66325	0	70	0	3.32651	0	1	3	1	1.66325	0	0
F	Hispanic-White	70436	26.4561	1.81867	80	1	49.4921	29.0431	1	5.22382	1	1	68	1	0	2.19941	0	63	0	2.19941	0	1	6	0	1.09971	0	0
M	Hispanic-White	169547	21.4104	1.7894	90	1	49.399	16.3614	1	8.01643	1	1	13	1	0	2.23539	0	84	1	1.11769	1	1	6	1	4.47078	0	0
M	Black	137275	21.7972	1.65079	100	1	46.9979	48.8214	0	11.4004	1	1	38	1	1	0	1	69	0	0	1	1	4	1	0	1	0
F	White	66471	34.0076	1.96752	90	1	44.3559	10.7762	1	2.06982	1	1	41	1	0	2.03302	0			x		0	8	0	6.09905	0	0
Male	White	95725	26.5418	2.03579	90	1	38.1848	36.7967	1	15.4743	1	1	41	1	0	x		85	1	0	1	1	4	1	0	1	0
F	White	70992	21.2846	1.74549	60	1	34.5298	21.2567	1	19.7782	1	1	21	1	0	0	1	90	1	0	1	1	6	1	4.58325	0	0
Male	Hispanic-White	137275	24.4594	1.74869	100	1	30.4668	15.2772	1	8.08214	1	1	42	1	0	0.571856	1	60	0	2.28742	0	1	12	1	6.86227	0	1
F	White	94870	19.9163	1.68845	90	1	30.2916	36.5996	1	30.1273	1	1	29	1	0	0.592259	1	75	1	2.36904	0	1	6	1	0	1	0
M	White	105799	27.4609	1.81029	100	0	79.2498	24.4435	1	15.7043	1	1	41	1	0	0	1	71	1	0	1	1	0	1	2.20959	0	0
M	White	60966	22.24	1.94396	90	0	77.9576	14.883	1	8.73922	1	1	20	1	0	2.05766	0	76	1	1.02883	1	1	5	1	0	1	1
M	White	97440	25.0878	2.06467	90	0	76.386	15.2444	1	12.5175	1	1	42	1	0	0.484339	1	71	1	0	1	1	6	1	4.84339	0	0
M	White	71369	25.1022	2.02238	90	0	75.0828	27.4004	1	17.9713	1	1	39	1	1	0.988932	1	65	1	0	1	1	0	1	0	1	0
F	Black	77171	24.208	1.77998	80	0	75.0198	21.6509	1	4.3039	1	1	43	1	0	0	1			x		0	0	0	0.561803	0	0
F	Declined	55150	26.9553	1.83575	90	0	74.3628	17.4784	1	5.4538	1	1	41	1	1	2.17895	0			x		0	4	0	1.08948	0	0
M	Hispanic-White	62795	28.3503	2.05908	60	0	73.7084	6.17659	1	1.37988	1	1	14	1	0	1.94261	0			x		0	6	0	1.94261	0	0
F	White	82342	30.2284	1.76735	90	0	72.6762	9.46201	1	1.90554	1	1	23	1	1	2.26327	0	106	0	2.26327	0	1	2	0	1.13164	0	0
Male	White	81404	33.0574	2.46946	80	0	72.5284	7.68789	1	1.90554	1	1	33	1	1	0	1					1	12	0	0	1	0
M	White	105799	23.0103	1.93629	90	0	72.4216	15.5729	1	11.8604	1	1	33	1	0	1.03291	1	71	1	0	1	1	1	1	0	1	0
M	White	105825	28.055	2.04833	100	0	71.1814	40.6735	1	20.0739	1	1	26	1	1	0.244101	1	57	0	0	1	1	7	1	0	1	0
F	White	132500	20.2204	1.70129	100	0	70.705	24.5421	1	9.56057	1	1	34	1	0	0	1	78	1	0	1	1	4	1	0	1	0
M	Hispanic-White	69857	31.1736	1.88376	90	0	70.6667	27.6632	1	6.93224	1	1	35	1	0	0	1	68	1	0	1	1	6	1	0	1	1
F	Hispanic-White	50190	30.4174	1.77287	80	0	70.4887	6.6037	1	4.07392	1	1	31	1	0	1.12812	1			x		0	6	0	3.38435	0	0
M	White	142073	28.12	2.09544	80	0	70.2505	15.5072	1	7.35934	1	1	29	1	0	0	1	57	0	1.90891	0	1	6	0	1.90891	0	0
M	White	87476	27.4397	2.09215	90	0	70.1136	14.6201	1	9.98768	1	1	33	1	0	0	1	62	0	1.9119	0	1	6	1	3.82381	0	0
M	White	81857	23.0859	2.02199	80	0	69.744	17.5113	1	12.386	1	1	27	1	0	0	1	82	0	1.97825	0	1	6	1	1.97825	0	0
M	White	110454	29.2862	2.27738	70	0	69.5606	39.7207	1	37.1253	1	1	27	1	0	0	1	79	1	1.7564	0	1	3	0	0	1	0
M	White	97476	25.8398	1.88095	90	0	68.4052	28.4517	1	16.0986	1	1	26	1	0	0	1	81	1	0	1	1	1.6	1	1.06329	0	0
M	Hispanic-White		25.8402	1.96581	80	0	68.1068	21.3881	1	7.95072	1	1	21	1	0	0	1	82	0	0	1	1	0	1	4.06957	0	1
M	Black	67251	40.3106	2.4553	80	0	67.2361	9.72485	1	8.9692	1	1	41	1	0	0.407283	1	77	1	0.814565	1	1	1	0	0.814565	0	0
F	Black	85300	26.9361	1.92044	90	0	66.8939	25.1006	1	21.5852	1	1	55	1	1	0	1	137	0	0	1	1	6	1	2.08286	0	0
F	White	135530	32.8067	1.79609	90	0	66.7762	22.308	1	7.58932	1	1	20	1	1	0.556764	1	72	1	0	1	1	6	0	0	1	0
M	White	78422	26.3096	1.89797	80	0	65.7194	8.54209	1	6.6037	1	1	45	1	0	x				x		0	0	0	2.10751	0	0
M	White	149849	33.9024	2.40013	90	0	65.5469	17.117	1	4.43532	1	1	38	1	0	0	1	74	1	0	1	1	6	1	0	1	1
F	White	82342	49.2229	2.53817	70	0	65.4648	17.7413	1	8.77207	1	1	50	1	0	0.78797	1	74	1	1.57594	0	1	6	0	1.57594	0	0
M	White	81101	34.6996	2.27802	90	0	65.1581	10.2177	1	4.10678	1	1	32	1	1	0.877957	1	42	0	0.438978	1	1	6	0	1.75591	0	0
M	White	56301	39.5285	2.3787	90	0	65.1116	8.90349	1	4.40246	1	1	17	1	0	1.68159	0			x		0	15	0	2.52239	0	0
M	White	70668	22.1487	1.81999	100	0	64.5585	16.23	1	15.7372	1	1	28	1	1	0	1	63	0	0	1	1	2	1	5.49454	0	0
F	Hispanic-White	78422	52.4283	2.44295	60	0	64.3669	13.5688	1	4.04107	1	1	40	1	0	3.27473	0	59	0	4.9121	0	1	5	0	2.45605	0	0
M	White	80581	29.3698	2.375	100	0	64.2656	15.4415	1	9.36345	1	1	36	1	0	0	1	85	0	0.842107	1	1	6	0	0.842107	0	0
M	White	60927	29.2448	2.36994	80	0	64.0137	30.193	1	15.3758	1	1	20	1	0	0	1	65	1	0.843904	1	1	6	1	0	1	0
M	White	90534	27.1219	2.14674	80	0	63.8631	28.9774	1	22.4066	1	1	21	1	0	0.465822	1	73	1	0	1	1	6	1	0	1	0
Male	White	39133	24.9637	1.97434	90	0	63.8275	27.4661	1	18.8912	1	1	25	1	1	0	1	78	1	1.013	1	1	2	1	1.013	0	0
F	White	127645	24.7436	1.84062	80	0	63.269	29.9959	1	4.89528	1	1	48	1	1	2.17318	0	70	1	0.543295	1	1	0	1	2.17318	0	1
F	White	58360	25.0149	1.80941	70	0	63.091	18.2012	1	3.48255	1	1	34	1	0	1.10533	1	102	0	1.10533	1	1	6	0	1.10533	0	0
M	White	125185	23.5961	2.00235	90	0	62.9213	14.2587	1	9.95483	1	1	25	1	0	0.998828	1	121	0	1.99766	0	1	12	1	1.99766	0	0
F	White	120304	22.2963	1.66958	90	0	62.8392	22.6694	1	3.02259	1	1	48	1	0	0	1	71	1	0	1	1	12	1	0	1	1
M	White	30324	32.1316	2.534	100	0	62.538	10.7105	1	6.43943	1	1	24	1	1	0.789265	1	64	0	0.789265	1	1	8	0	0.789265	0	0
Male	White	64227	31.597	2.31709	90	0	62.1656	17.8727	1	5.68378	1	1	34	1	1	0	1	75	1	0	1	1	12	1	0	1	1
Male	Black	57214	18.7926	1.60408	70	0	61.7522	21.2895	1	7.55647	1	1	41	1	1	0	1	70	1	0	1	1	6	1	1.24682	0	1
M	White	111537	27.1157	2.05768	90	0	61.5633	9.03491	1	2.92402	1	1	64	1	0	5.83181	0	50	0	2.9159	0	1	1	0	0.485984	0	0
M	White	117500	36.973	2.61162	100	0	61.5469	37.5195	1	29.7331	1	1	26	1	0	0	1	70	1	0	1	1	6	1	3.06323	0	0
M	White	102286	30.61	2.11035	80	0	61.3771	3.35113	1	1.87269	1	1	17	1	0	0.947708	1			x		0	0	0	1.89542	0	0
F	White	51463	24.1827	1.58077	70	0	61.2539	9.16632	1	3.90965	1	1	41	1	0	1.26521	0			x		0	2	0	0.632604	0	0
F	White	120418	32.2363	1.9156	60	0	60.8953	12.4189	1	10.1848	1	1	31	1	1	0	1	136	0	0	1	1	6	1	2.08812	0	0
F	Asian	32570	29.9116	2.02373	70	0	60.8159	20.3696	1	17.8398	1	1	49	1	1	0	1	70	1	0	1	1	3	0	0	1	0
M	White	70533	29.9746	2.11724	100	0	60.2628	39.5236	1	33.0185	1	1	33	1	0	0	1	76	1	0	1	1	6	1	1.88925	0	0
M	White	108958	34.9676	2.23726	90	0	60	13.5359	1	12.2546	1	1	27	1	0	1.7879	0	66	1	0.446975	1	1	0	1	1.7879	0	0
M	White	42643	28.2308	2.23597	80	0	59.4059	15.3429	1	6.50513	1	1	28	1	0	3.57786	0	63	0	0.894465	1	1	10	0	0.894465	0	0
M	White	66858	34.4043	2.2683	90	0	58.9514	30.9487	1	5.05955	1	1	40	1	0	x		75	1	1.76343	0	1	5	0	1.76343	0	0
Male	Hispanic-White	42028	25.0149	1.80941	70	0	58.8939	5.78234	1	4.89528	1	1	30	1	0	2.21067	0					0	6	0	2.21067	0	0
M	White	54442	34.6622	2.52869	80	0	58.3135	9.3963	1	4.36961	1	1	29	1	1	1.58185	0	83	0	1.58185	0	1	6	0	1.58185	0	0
F	White	102414	22.312	1.63177	90	0	58.3107	8.01643	1	2.59548	1	1	31	1	0	0	1	83	0	0.61283	1	1	6	0	0.61283	0	0
M	White	103068	27.4059	1.93711	90	0	58.2478	12.9117	1	6.01232	1	1	28	1	1	2.06493	0	108	0	1.03246	1	1	2	1	0.516232	0	1
F	White	125185	56.325	2.53211	90	0	58.1875	6.89938	1	3.48255	1	1	45	1	0	0	1	95	0	4.73914	0	1	6	0	1.57971	0	0
M	White	112815	30.8512	2.05527	90	0	57.3196	12.5503	1	11.0719	1	1	63	1	0	1.94622	0	77	1	3.89243	0	1	6	0	1.45966	0	0
F	Black	71089	34.0161	1.9211	80	0	56.7474	10.4805	1	7.52361	1	1	39	1	1	2.08214	0	69	1	2.08214	0	1	6	0	6.24641	0	0
F	White	95698	16.6482	1.40953	70	0	56.731	18.4312	1	12.4189	1	1	19	1	1	0.709457	1	69	1	0	1	1	3	1	1.41891	0	0
F	White	52623	17.5351	1.41282	70	0	56.6762	17.6427	1	1.87269	1	1	24	1	1	1.41561	0	76	1	x		1	3	1	5.66244	0	1
M	Hispanic-White	58607	26.9361	1.92044	90	0	56.386	19.4497	1	9.10062	1	1	86	1	0	0.520715	1	73	1	0	1	1	12	1	4.16572	0	0
M	White	27068	28.7492	2.2102	90	0	55.9179	21.5195	1	9.3306	1	1	22	1	0	0	1	70	1	0	1	1	7	1	3.61957	0	1
M	White	87443	26.4439	2.11974	80	0	55.8056	12.9446	1	4.13963	1	1	21	1	1	0.471757	1	72	1	0.943514	1	1	6	1	0	1	1
M	White	54624	34.9938	2.59244	80	0	55.7207	12.2218	1	8.14784	1	1	61	1	0	x		99	0	3.0859	0	1	0	0	0.771475	0	0
F	White	85625	24.1266	1.73676	100	0	55.6961	25.1992	1	3.44969	1	1	36	1	0	0	1	70	1	0.575786	1	1	0	1	0.575786	0	1
M	Hispanic-White	132500	25.7693	1.94181	80	0	54.9733	11.0062	1	9.98768	1	1	22	1	1	0.257491	1	47	0	1.02996	1	1	12	1	2.05993	0	0
Male	White	38341	24.8166	2.05348	80	0	53.911	13.8645	1	5.35524	1	1	22	1	1	1.94791	0	73	1	1.94791	0	1	2	0	1.94791	0	0
M	White	79532	28.0813	1.9171	90	0	53.6537	20.6324	1	7.72074	1	1	66	1	0	x		73	1	x		1	6	1	4.17297	0	1
M	White	196233	28.8872	2.49813	90	0	53.5222	18.8912	1	5.8809	1	1	17	1	0	0	1	71	1	0	1	1	6	0	0.400299	0	0
F	White	51550	29.8565	1.97677	100	0	53.2868	18.3655	1	5.38809	1	1	13	1	0	0	1	54	0	0	1	1	0	1	0	1	1
F	Hispanic-White	77171	28.2864	1.88053	90	0	52.898	14.3901	1	4.6653	1	1	47	1	0	4.25413	0			x		0	5	0	1.06353	0	0
Female	White	95698	17.575	1.3146	90	0	52.3039	5.61807	1	4.56674	1	1	65	1	0	0	1					0	12	0	9.12822	0	0
F	White	90743	18.8928	1.39721	90	0	52.1424	22.4723	1	12.7146	1	1	29	1	0	x		86	0	0	1	1	12	0	0	1	0
M	White	56301	28.8851	2.30837	70	0	51.666	13.0103	1	9.16632	1	1	34	1	0	1.73282	0	80	1	0.866412	1	1	0	0	0.433206	0	0
M	Black	61135	33.0512	2.32061	90	0	50.7789	11.0062	1	9.62628	1	1	47	1	0	0.861843	1	71	1	1.72369	0	1	2	0	5.17106	0	0
F	White	132500	26.7795	1.91485	90	0	50.1711	16.8542	1	7.16222	1	1	19	1	1	0.522235	1	75	1	0	1	1	6	1	0	1	1
M	Hispanic-White	112815	23.5681	1.95962	90	0	50.0424	18.3984	1	8.54209	1	1	27	1	1	0	1	72	1	0	1	1	6	0	2.04122	0	0
F	Hispanic-White	64277	35.4245	2.00809	100	0	49.963	39.1294	0	39.1294	0	1	53	1	0	0	1	76	1	0	1	1	8	1	0	1	0
Male	Black	111111	21.7667	1.96337	90	0	49.8864	16.1971	1	4.50103	1	1	14	1	1	1.01866	1	87	0	2.03732	0	1	6	0	2.03732	0	0
M	White	99533	20.5001	1.82762	80	0	49.8097	14.9158	1	5.65092	1	1	27	1	1	2.18864	0	64	0	4.37728	0	1	1	0	6.56591	0	0
Female	Black	32570	33.4675	1.90555	70	0	48.961	18.0698	1	3.28542	1	1	41	1	0	4.19827	0	308	0	2.09913	0	1	6	1	2.09913	0	1
F	White	95698	24.0466	1.77404	90	0	48.3368	15.8686	1	0.985626	1	1	45	1	1	1.69106	0			x		0	0	0	6.76422	0	0
M	Black	87574	41.9901	2.89677	70	0	47.4552	8.24641	1	5.4538	1	1	50	1	0	0	1	43	0	0	1	1	3	0	0.345212	0	0
M	Hispanic-White	70436	27.2493	1.93157	90	0	46.3765	14.0945	1	5.58522	1	1	33	1	0	0	1	82	0	2.07085	0	1	8	1	2.07085	0	1
M	White	121118	20.8031	1.80232	80	0	45.7906	10.3491	1	5.28953	1	1	78	1	1	2.21936	0			x		0	1	0	4.43873	0	0
M	White	240694	24.9328	2.10131	90	0	44.9062	24.2464	1	14.7187	1	1	30	1	0	0	1	76	1	0	1	1	23	1	0	1	0
M	Black	31744	24.2738	1.82306	80	0	44.8679	4.36961	1	2.69405	1	1	21	1	0	2.19411	0			x		0	6	0	2.19411	0	0
M	White	174545	24.8535	1.80356	100	0	44.6543	27.6304	1	6.89938	1	1	30	1	0	1.10892	1	118	0	0	1	1	6	0	0	1	0
M	Black	111290	56.2577	2.90058	90	0	44.1643	5.0924	1	2.52977	1	1	62	1	1	0.689516	1	70	1	1.37903	0	1	5	0	0.344758	0	0
M	Hispanic-White	47714	26.9151	2.09414	70	0	41.7139	14.6201	1	10.2505	1	1	21	1	0	1.91009	0	67	1	3.82018	0	1	4	1	0.955045	0	0
Male	Hispanic-White	55961	32.535	2.15804	90	0	40.397	12.5175	1	11.2033	1	1	35	1	0	1.85353	0	75	1	0.926767	1	1	6	0	0.926767	0	0
F	Hispanic-White	78422	28.1889	1.96459	100	0	39.7016	17.8398	1	14.4887	1	1	49	1	1	0	1	68	1	0	1	1	6	1	2.03605	0	0
M	Black	65734	21.9247	1.73261	70	0	38.883	24.115	1	8.93634	1	1	60	1	0	0	1	196	0	2.30866	0	1	5	0	0	1	0
M	White	105799	20.8198	1.76454	80	x	60.8734	15.9343	1	9.23203	1	1	30	1	1	1.70016	0	86	1	0.283359	1	1	6	1	0	1	0
M	White	53398	28.3097	2.14771	80	x	73.5441	8.67351	1	8.21355	1	1	14	1	0	0	1	67	1	0.931225	1	1	4	1	0	1	0
F	White	70436	26.4674	1.8612	90	x	71.1431	19.1869	1	7.8193	1	1	22	1	0	0.537289	1	161	0	2.14916	0	1	4	0	2.14916	0	0
M	White	97189	22.5917	1.8381		x	44.4408	31.8029	1	11.5975	1	1	17	1	0	0.544041	1	73	1	x		1	5	0	4.35233	0	0

## Sheet: Boosting
KPS	KPS<70	Age	OS	Status	Initial	Boost	Where Boost	Total	Plan Gy
100	0	77.9986	60.9117	1	25x2 Gy	5x2 Gy	Not indicated	60	60
90	0	75.0828	27.4004	1	23x2 Gy	7x2 Gy	Tumor Bed	60	60
90	0	74.3628	17.4784	1	23x2 Gy	7x2 Gy	Tumor Bed	60	60
90	0	72.6762	9.46201	1	25x2 Gy	5x2 Gy	Tumor Bed	60	60
80	0	72.5284	7.68789	1	25x2 Gy	5x2 Gy	Tumor Bed	60	60
100	0	71.1814	40.6735	1	25x2 Gy	5x2 Gy	Tumor Bed	60	60
90	0	70.1355	40.3778	1	23x2 Gy	7x2 Gy	tumor bed boost	60	60
70	0	69.8645	13.2731	1	23x2 Gy	7x2 Gy	Tumor Bed	60	60
80	0	66.9405	40.6407	1	25x2 Gy	5x2 Gy	Tumor Bed	60	60
90	0	66.8939	25.1006	1	23x2 Gy	7x2 Gy	Tumor Bed	60	60
90	0	66.7762	22.308	1	25x2 Gy	5x2 Gy	Tumor Bed	60	60
100	0	66.5654	27.6632	1	23x2 Gy	7x2 Gy	Tumor Bed	60	60
60	1	66.3326	35.8768	1	25x2 Gy	5x2 Gy	Tumor Bed	60	60
70	0	65.8535	23.2936	1	25x2 Gy	5x2 Gy	Tumor Bed	60	60
90	0	65.8042	42.1191	1	14x2 Gy	16x2 gy	Complex plan adaptive frontal NOT PTVwbrt	60	60
90	0	65.1581	10.2177	1	25x2 Gy	5x2 Gy	Tumor Bed	60	60
100	0	64.5585	16.23	1	23x2 Gy	7x2 Gy	Tumor Bed	60	60
100	0	63.948	45.1088	1	23x2 Gy	7x2 Gy	Not indicated	60	60
90	0	63.8275	27.4661	1	23x2 Gy	7x2 Gy	Tumor Bed	60	60
80	0	63.8248	38.8337	1	25x2 Gy	5x2 Gy	Tumor Bed	60	60
100	0	63.729	31.3429	1	25x2 Gy	5x2 Gy	Tumor Bed	60	60
50	1	63.436	25.2977	1	(9+16)x2 Gy	5x2 Gy	Tumor Bed	60	60
80	0	63.269	29.9959	1	23x2 Gy	7x2 Gy	Tumor Bed	60	60
100	0	62.538	10.7105	1	25x2 Gy	5x2 Gy	Tumor Bed	60	60
90	0	62.1656	17.8727	1	23x2 Gy	7x2 Gy	Tumor Bed	60	60
100	0	61.807	29.8645	1	23x2 Gy	7x2 Gy	Not indicated	60	60
70	0	61.7522	21.2895	1	25x2 Gy	5x2 Gy	Tumor Bed	60	60
100	0	61.7029	38.9322	0	23x2 Gy	7x2 Gy	Tumor Bed	60	60
80	0	61.514	35.8439	1	23x2 Gy	7x2 Gy	Not indicated	60	60
60	1	60.8953	12.4189	1	25x2 Gy	5x2 Gy	Tumor Bed	60	60
80	0	60.8734	15.9343	1	23x2 Gy	7x2 Gy	Tumor Bed	60	60
70	0	60.8159	20.3696	1	25x2 Gy	5x2 Gy	Tumor Bed	60	60
70	0	58.9569	20.6653	1	23x2 Gy	7x2 Gy	Tumor Bed	60	60
80	0	58.3135	9.3963	1	25x2 Gy	5x2 Gy	residual tumor	60	60
90	0	58.2478	12.9117	1	25x2 Gy	5x2 Gy	Tumor Bed	60	60
100	0	57.8535	67.5154	1	25x2 Gy	5x2 Gy	Tumor Bed	60	60
80	0	56.7474	10.4805	1	23x2 Gy	7x2 Gy	Tumor Bed	60	60
70	0	56.731	18.4312	1	23x2 Gy	7x2 Gy	Tumor Bed	60	60
70	0	56.6762	17.6427	1	25x2 Gy	5x2 Gy	Tumor Bed	60	60
80	0	56.6242	41.232	0	23x2 Gy	7x2 Gy	Not indicated	60	60
70	0	55.9206	26.8419	1	25x2 Gy	5x2 Gy	Tumor Bed	60	60
80	0	55.8056	12.9446	1	23x2 Gy	7x2 Gy	Tumor Bed	60	60
80	0	55.666	47.4415	0	23x2 Gy	7x2 Gy	Not indicated	60	60
90	0	55.6468	37.4538	1	25x2 Gy	5x2 Gy	Tumor Bed	60	60
90	0	55.3457	41.4949	1	25x2 Gy	5x2 Gy	Tumor Bed	60	60
70	0	55.0116	52.4025	1	23x2 Gy	7x2 Gy	Where planned	60	60
80	0	54.9733	11.0062	1	23x2 Gy	7x2 Gy	Tumor Bed	60	60
100	0	54.5654	8.83778	1	(22+3)x2 Gy	5x2 Gy	Tumor Bed	60	60
100	0	54.2533	39.8193	1	23x2 Gy	7x2 Gy	Tumor Bed	60	60
80	0	53.911	13.8645	1	23x2 Gy	7x2 Gy	Tumor Bed	60	60
70	0	53.3196	35.6468	1	22x2 Gy	8x2 Gy	Tumor Bed (rim on MRI)	60	60
90	0	52.6626	41.232	1	24x2 Gy	6x2 gy	parietal PTV boost	60	60
90	0	50.1711	16.8542	1	25x2 Gy	5x2 Gy	Tumor Bed	60	60
90	0	50.0424	18.3984	1	25x2 Gy	5x2 Gy	Tumor Bed	60	60
90	0	49.8864	16.1971	1	23x2 Gy	7x2 Gy	Tumor Bed	60	60
80	0	49.8097	14.9158	1	23x2 Gy	7x2 Gy	Tumor Bed	60	60
90	0	48.3368	15.8686	1	23x2 Gy	7x2 Gy	Tumor Bed	60	60
100	0	46.9979	48.8214	0	23x2 Gy	7x2 Gy	Tumor Bed	60	60
80	0	45.7906	10.3491	1	25x2 Gy	5x2 Gy	Tumor Bed	60	60
90	0	44.1643	5.0924	1	25x2 Gy	5x2 Gy	Tumor Bed	60	60
100	0	39.7016	17.8398	1	23x2 Gy	7x2 Gy	Tumor Bed	60	60
